# Supplementary material for: Natural variations of OsALDH2B1 contribute geographical adaptation to soil pH in rice
Source: Research Square preprint supplement (doi:10.21203/rs.3.rs-7346407/v1), 2025-09-26
Supplement: Supplementary file 1 [file 79521f9fc85a3d136a60d98f.docx]

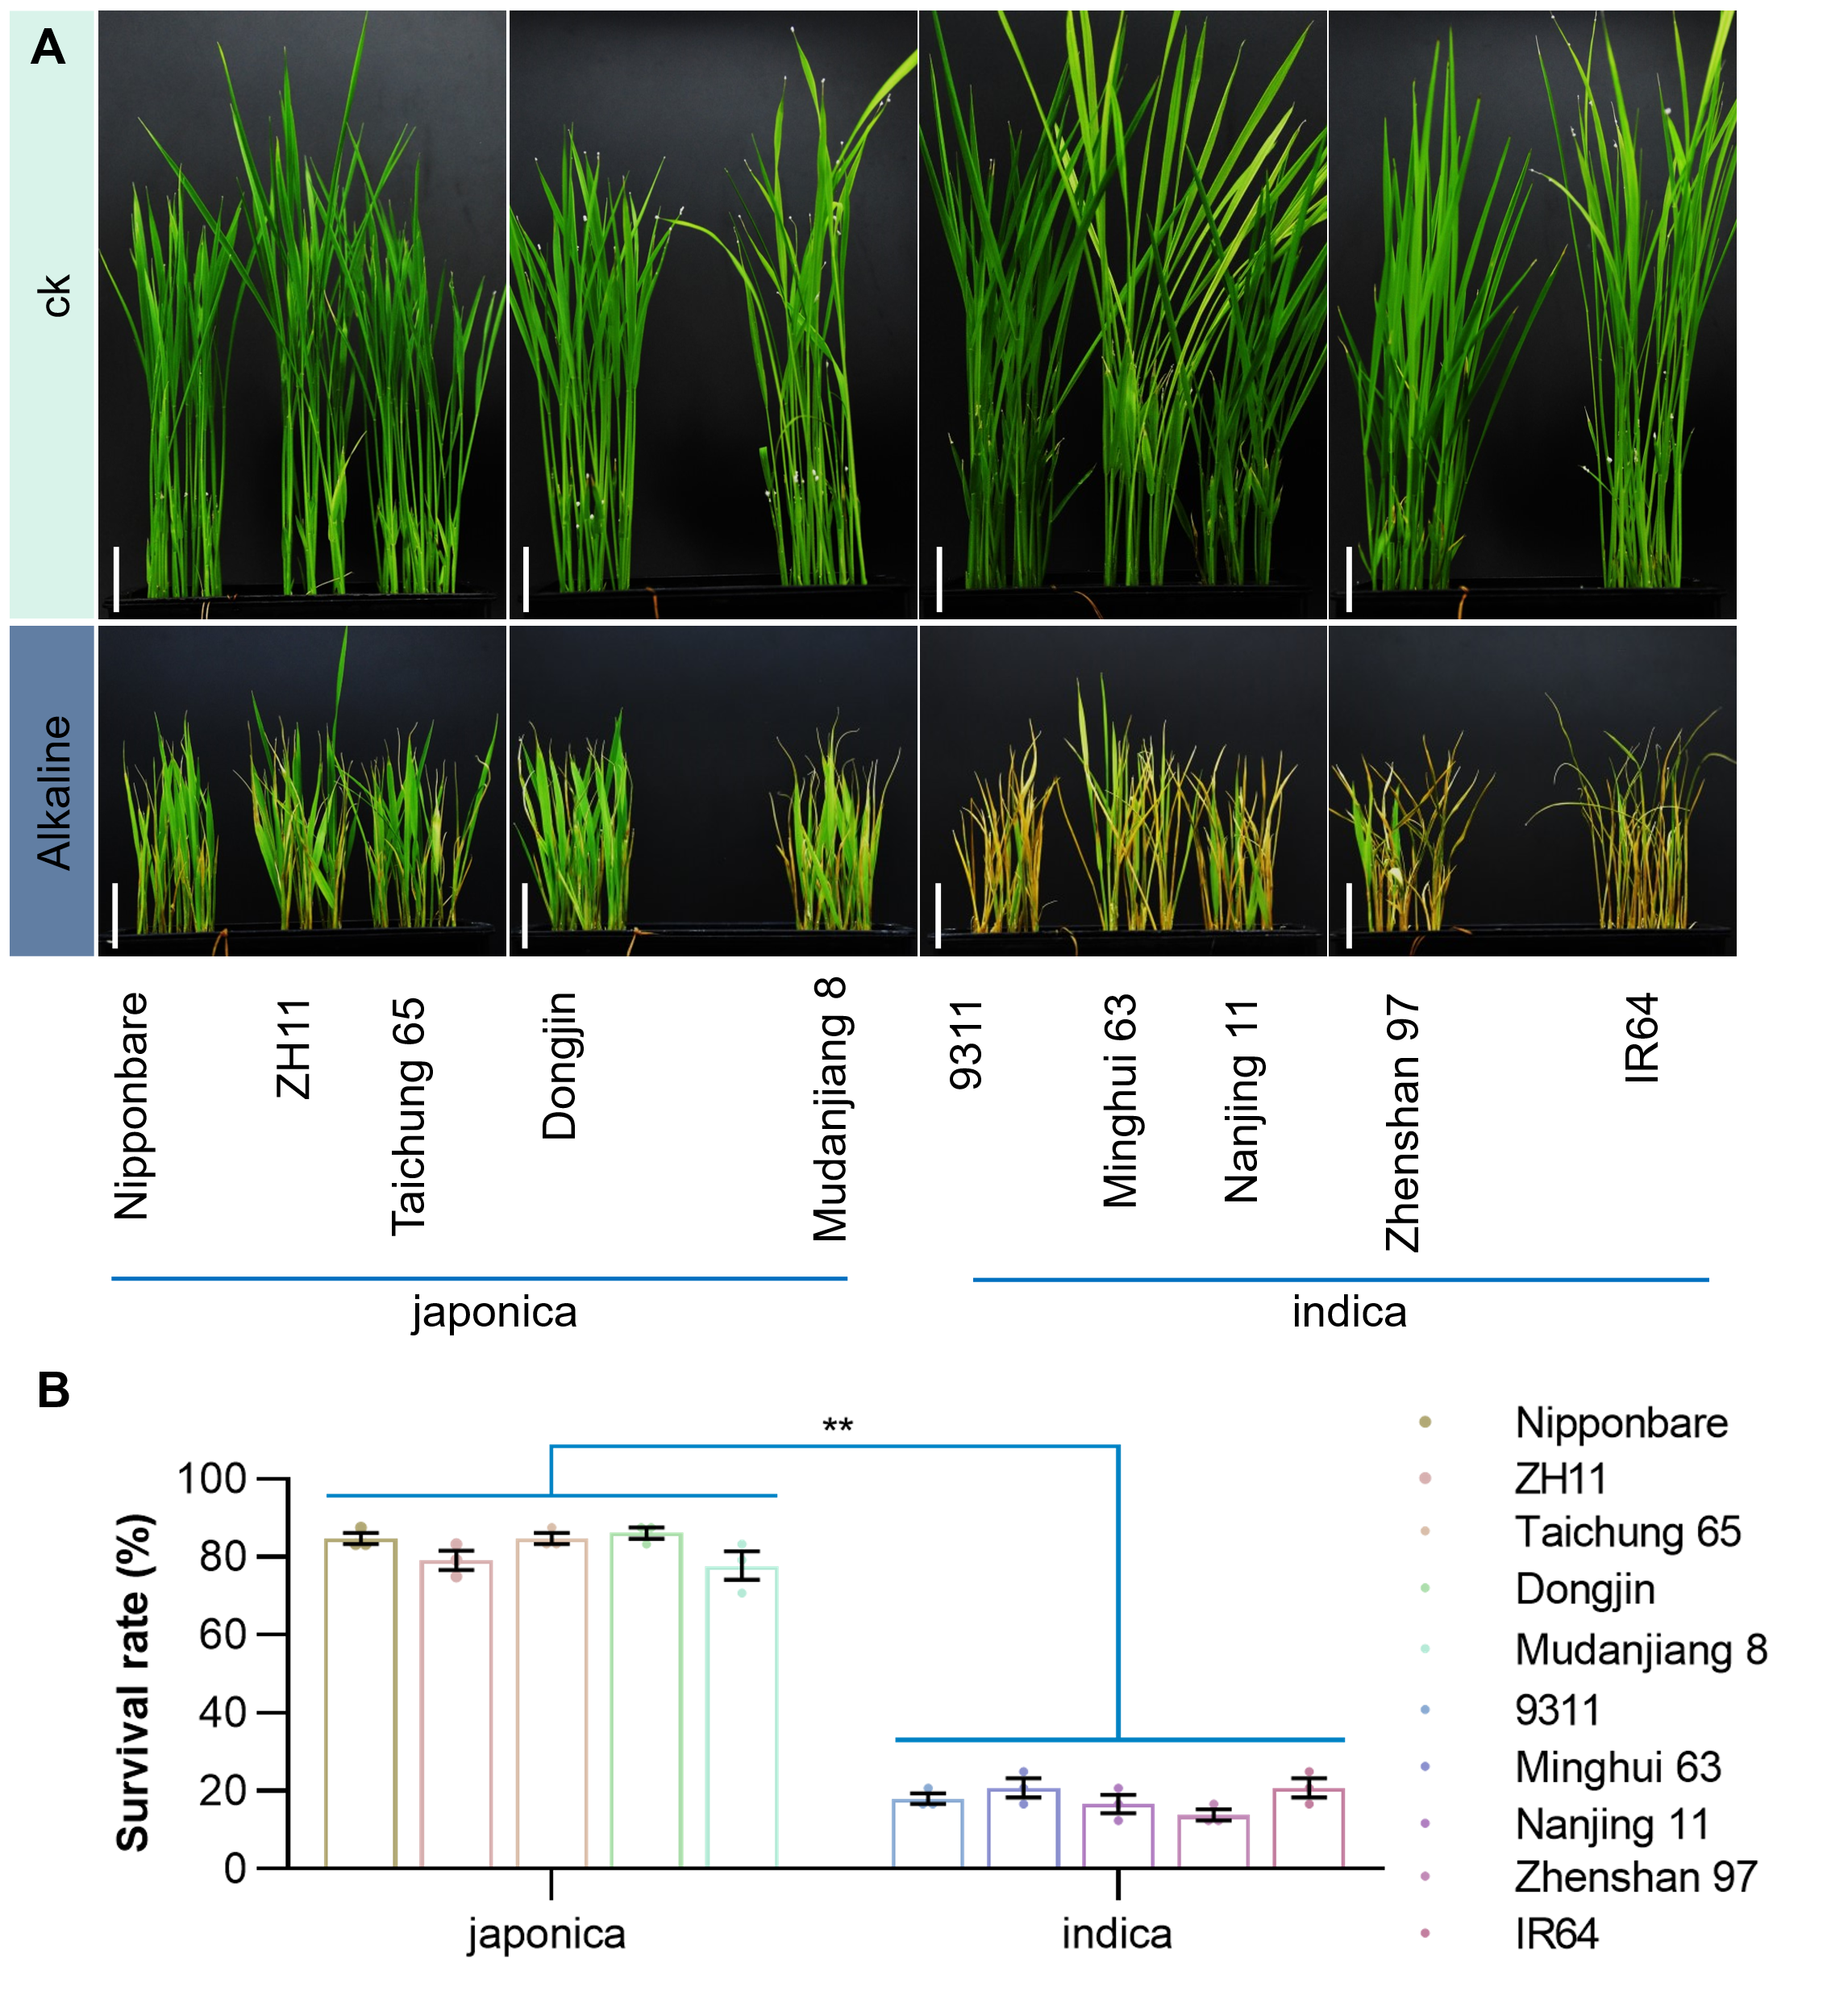


**Extended Data Fig.1**| **Alkaline tolerance analysis of ten rice varieties.**

**(A)** Representative phenotypes of different rice varieties before and after treatment and recovery at the seedling stage. Bars = 2 cm. **(B)** Survival rates of different rice varieties after alkali treatment and recovery at the seedling stage. n = 72 plants from three biological repeats.

Data represent mean ± SE. ***P* < 0.01 and **P* < 0.05 analyzed by Student’s *t-test*.


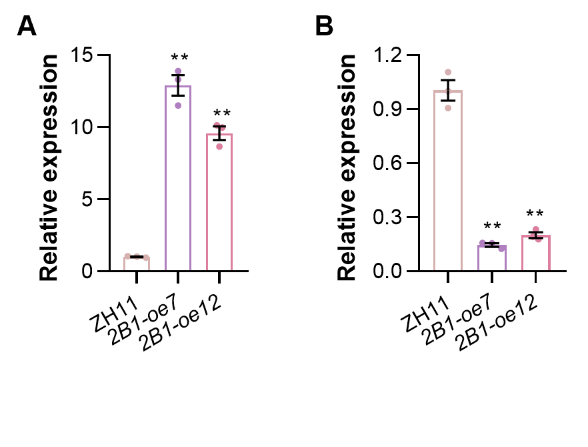


**Extended Data Fig.2**| ***OsALDH2B1* and *GS3* expression analysis in *2B1-oe* plants.**

**(A)** *OsALDH2B1* expression in *2B1-oe* two weeks seedling shoots (*2B1-oe*)*.* **(B)** *GS3* expression in ~3 cm young panicles of *2B1-oe* plants*.*

Data represent mean ± SE. n = 3. ***P* < 0.01 analyzed by Student’s *t-test*.


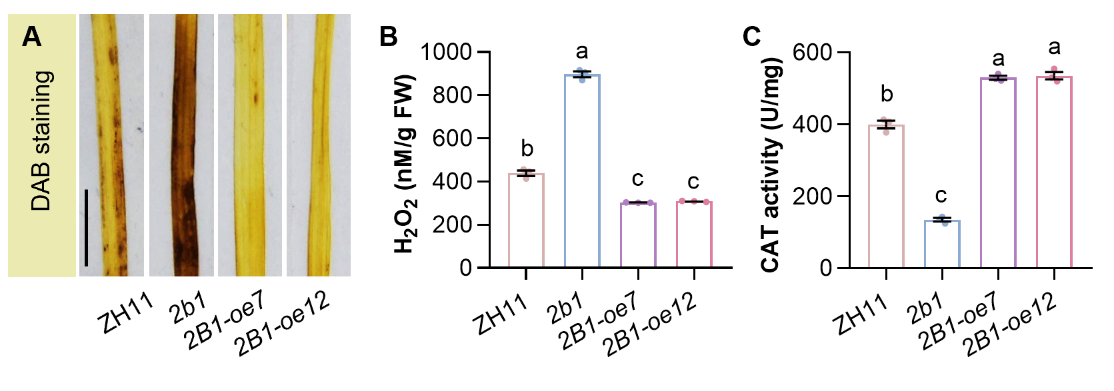
**Extended Data Fig.3**| ***OsALDH2B1* promotes H2O2 scavenging and catalase activity under alkaline stress.**

**(A-C)** Visible detection of H2O2 by 3,3’-diaminobenzidine (DAB) staining **(A)**,quantification of H2O2 content **(B)** and measurement of catalase activity **(C)** in leaves of ZH11, *2b1* and *2B1-oe* at 6 h exposed to alkaline treatment. Bar, 1 cm.

Data represent mean ± SE. n = 3. Different letters above bars indicate differences by Multiple range test at *P* < 0.05.


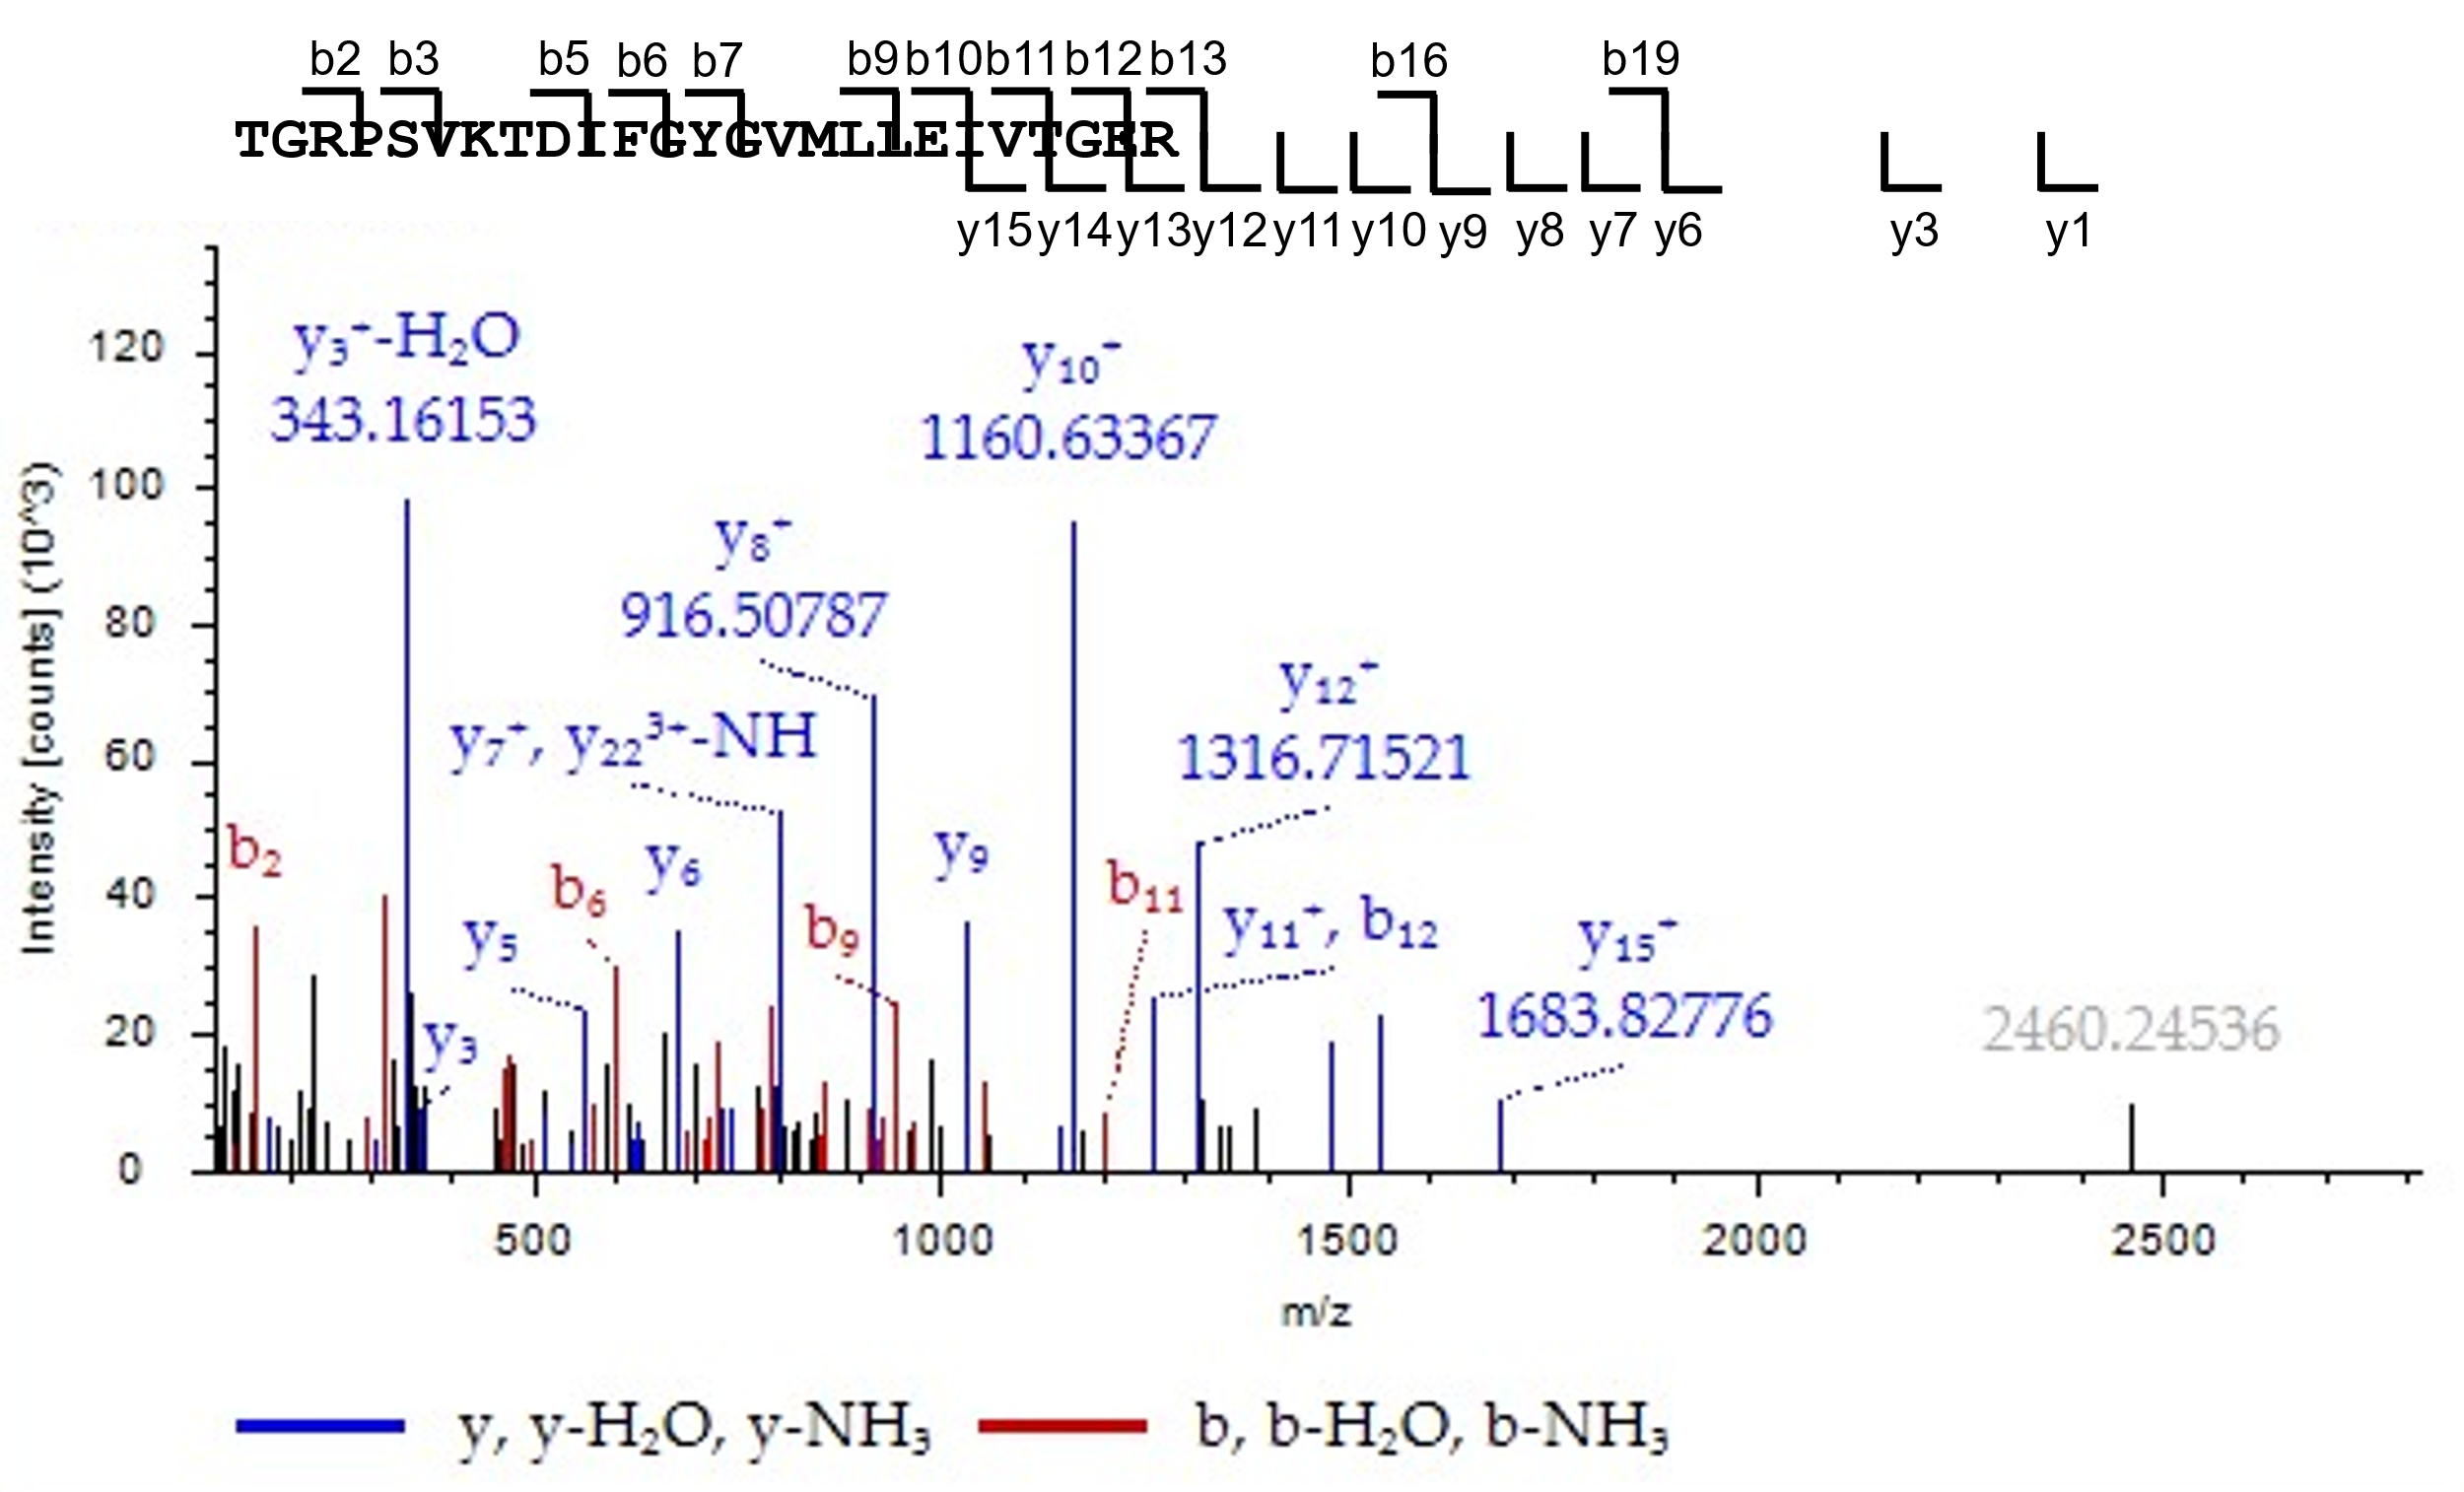


**Extended Data Fig.4**| **Identification of SERL1 (LOC_Os11g39370) peptide by liquid chromatography-tandem mass spectrometry (LC-MS/MS) analysis.**


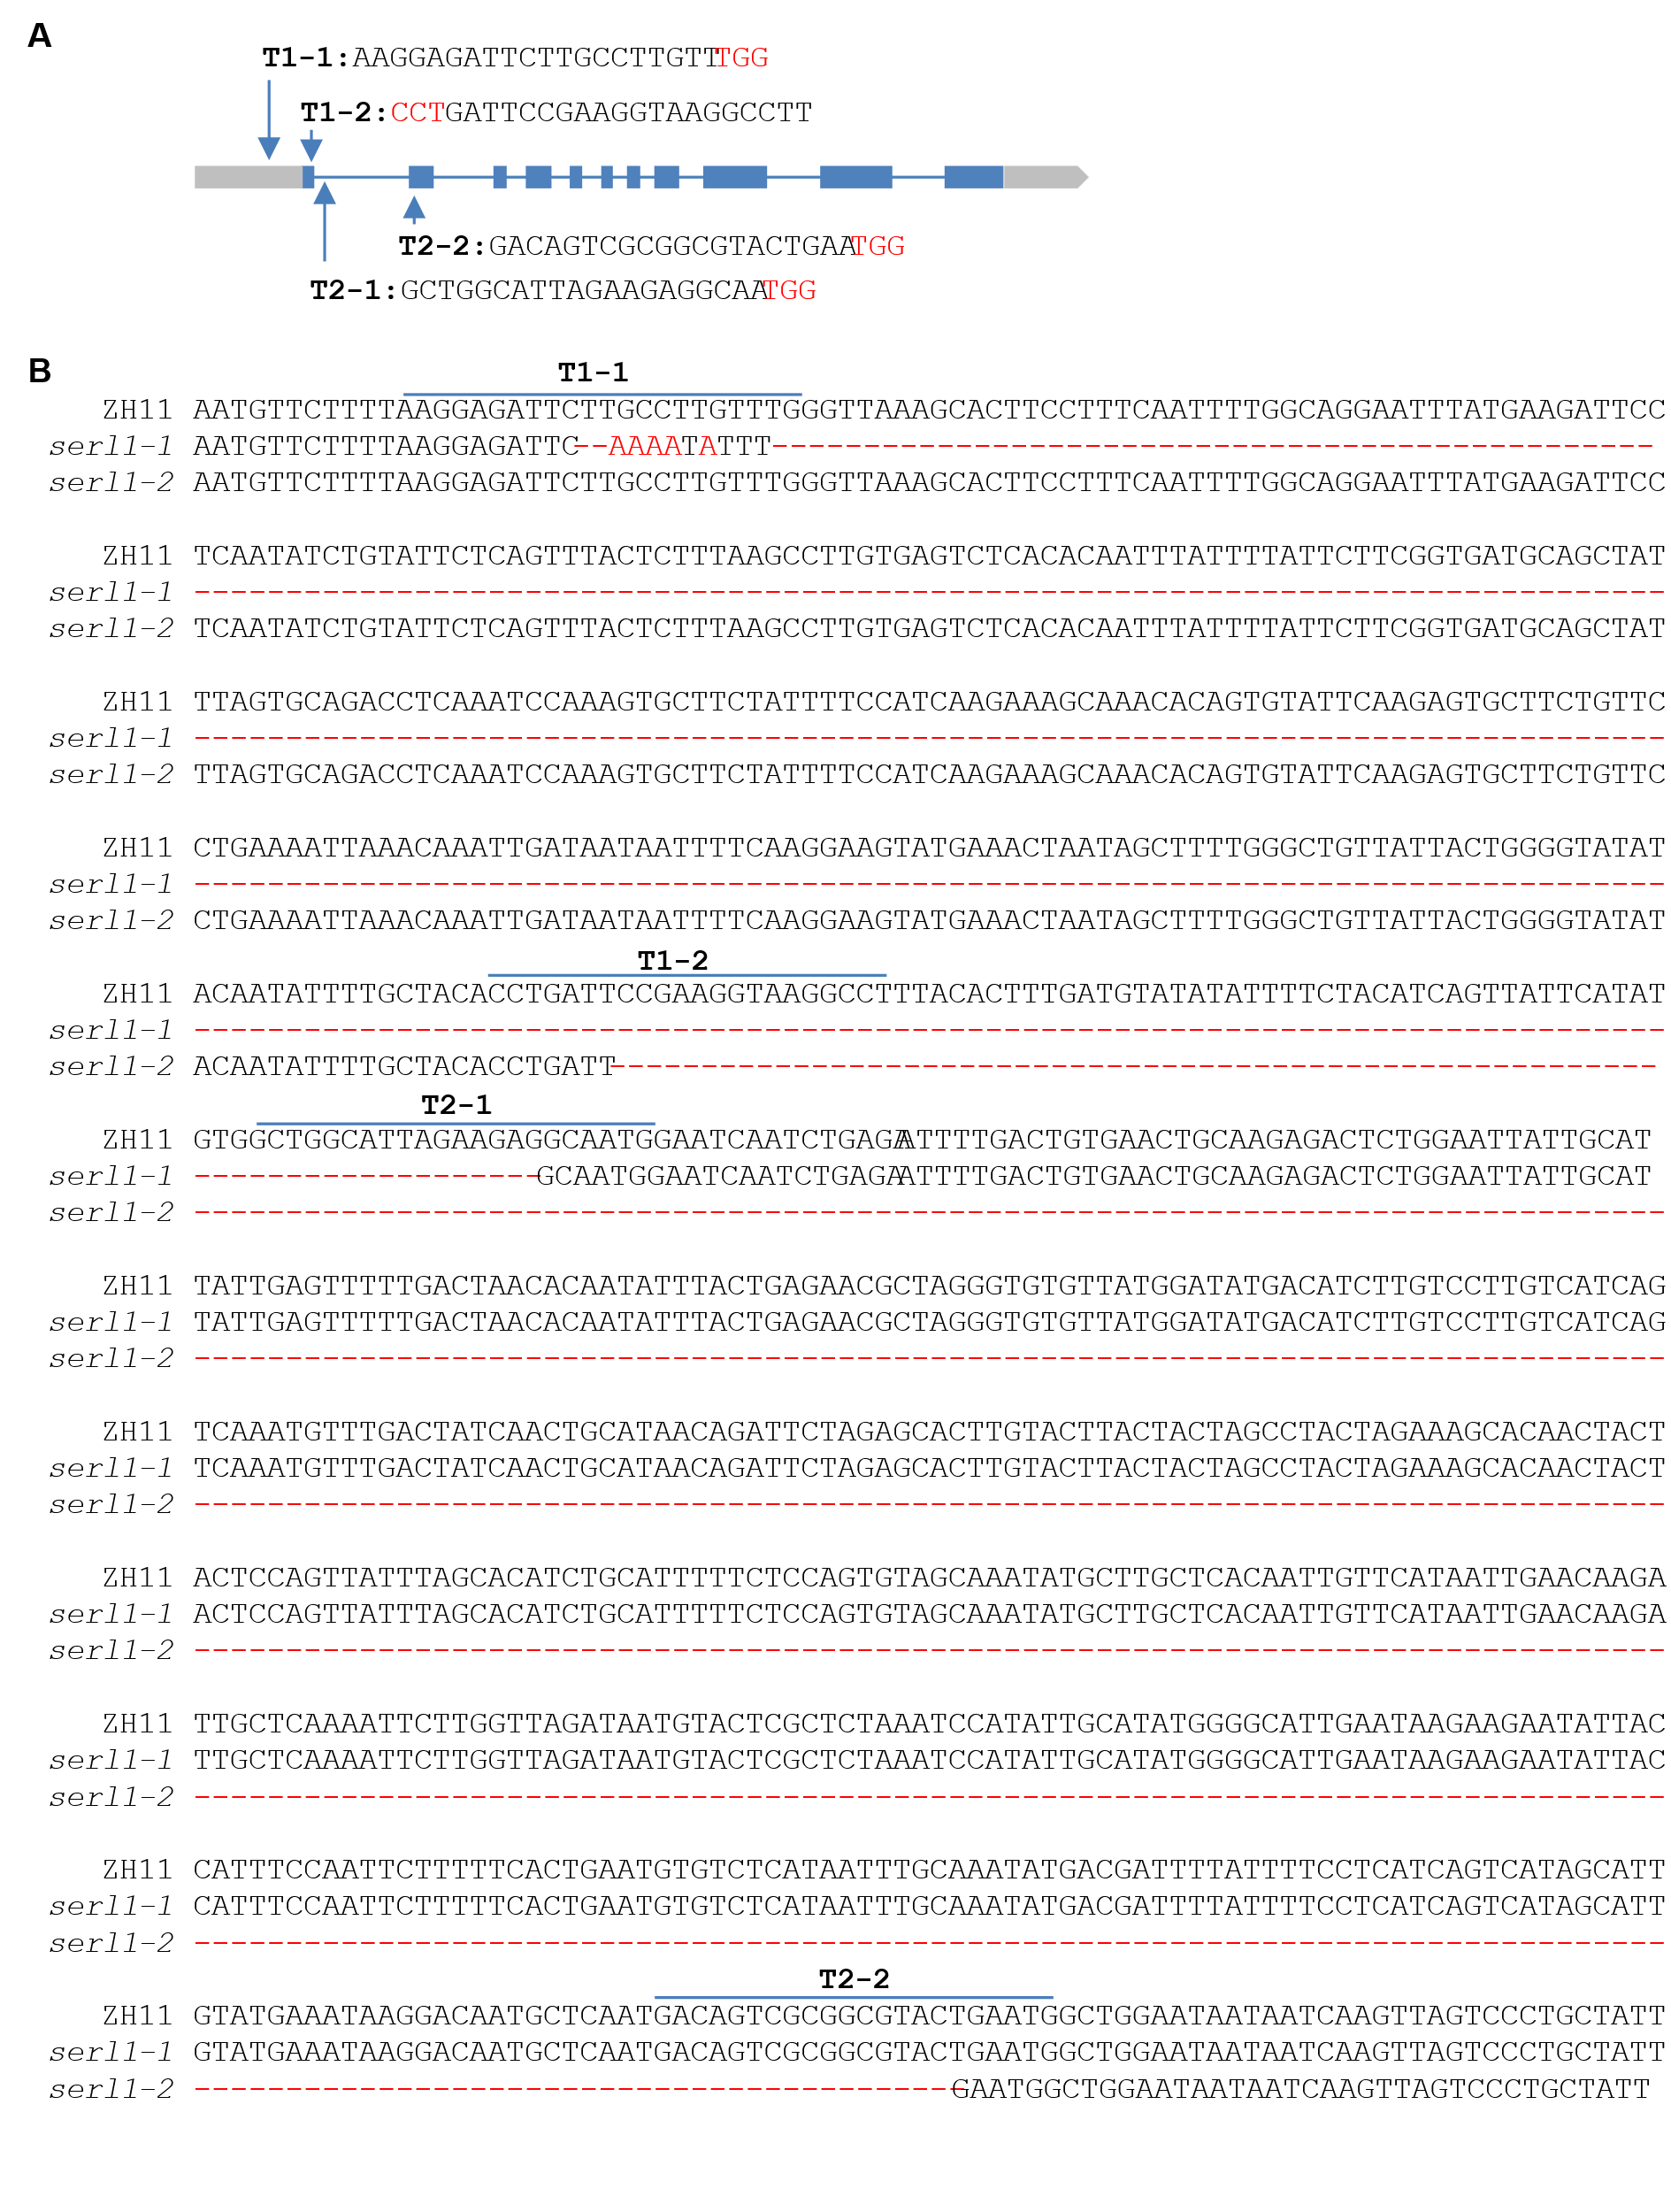


**Extended Data Fig.5**| **The *serl1* mutants genotype characterization.**

**(A)** Target sites designed for genome editing of *SERL1* by CRISPR/Cas9. The target site nucleotides are shown in capital letters, and the PAM site is indicated as red capital letters. **(B)** Sequence alignment of the target region showing large fragment deletion in two independent *serl1* mutants.


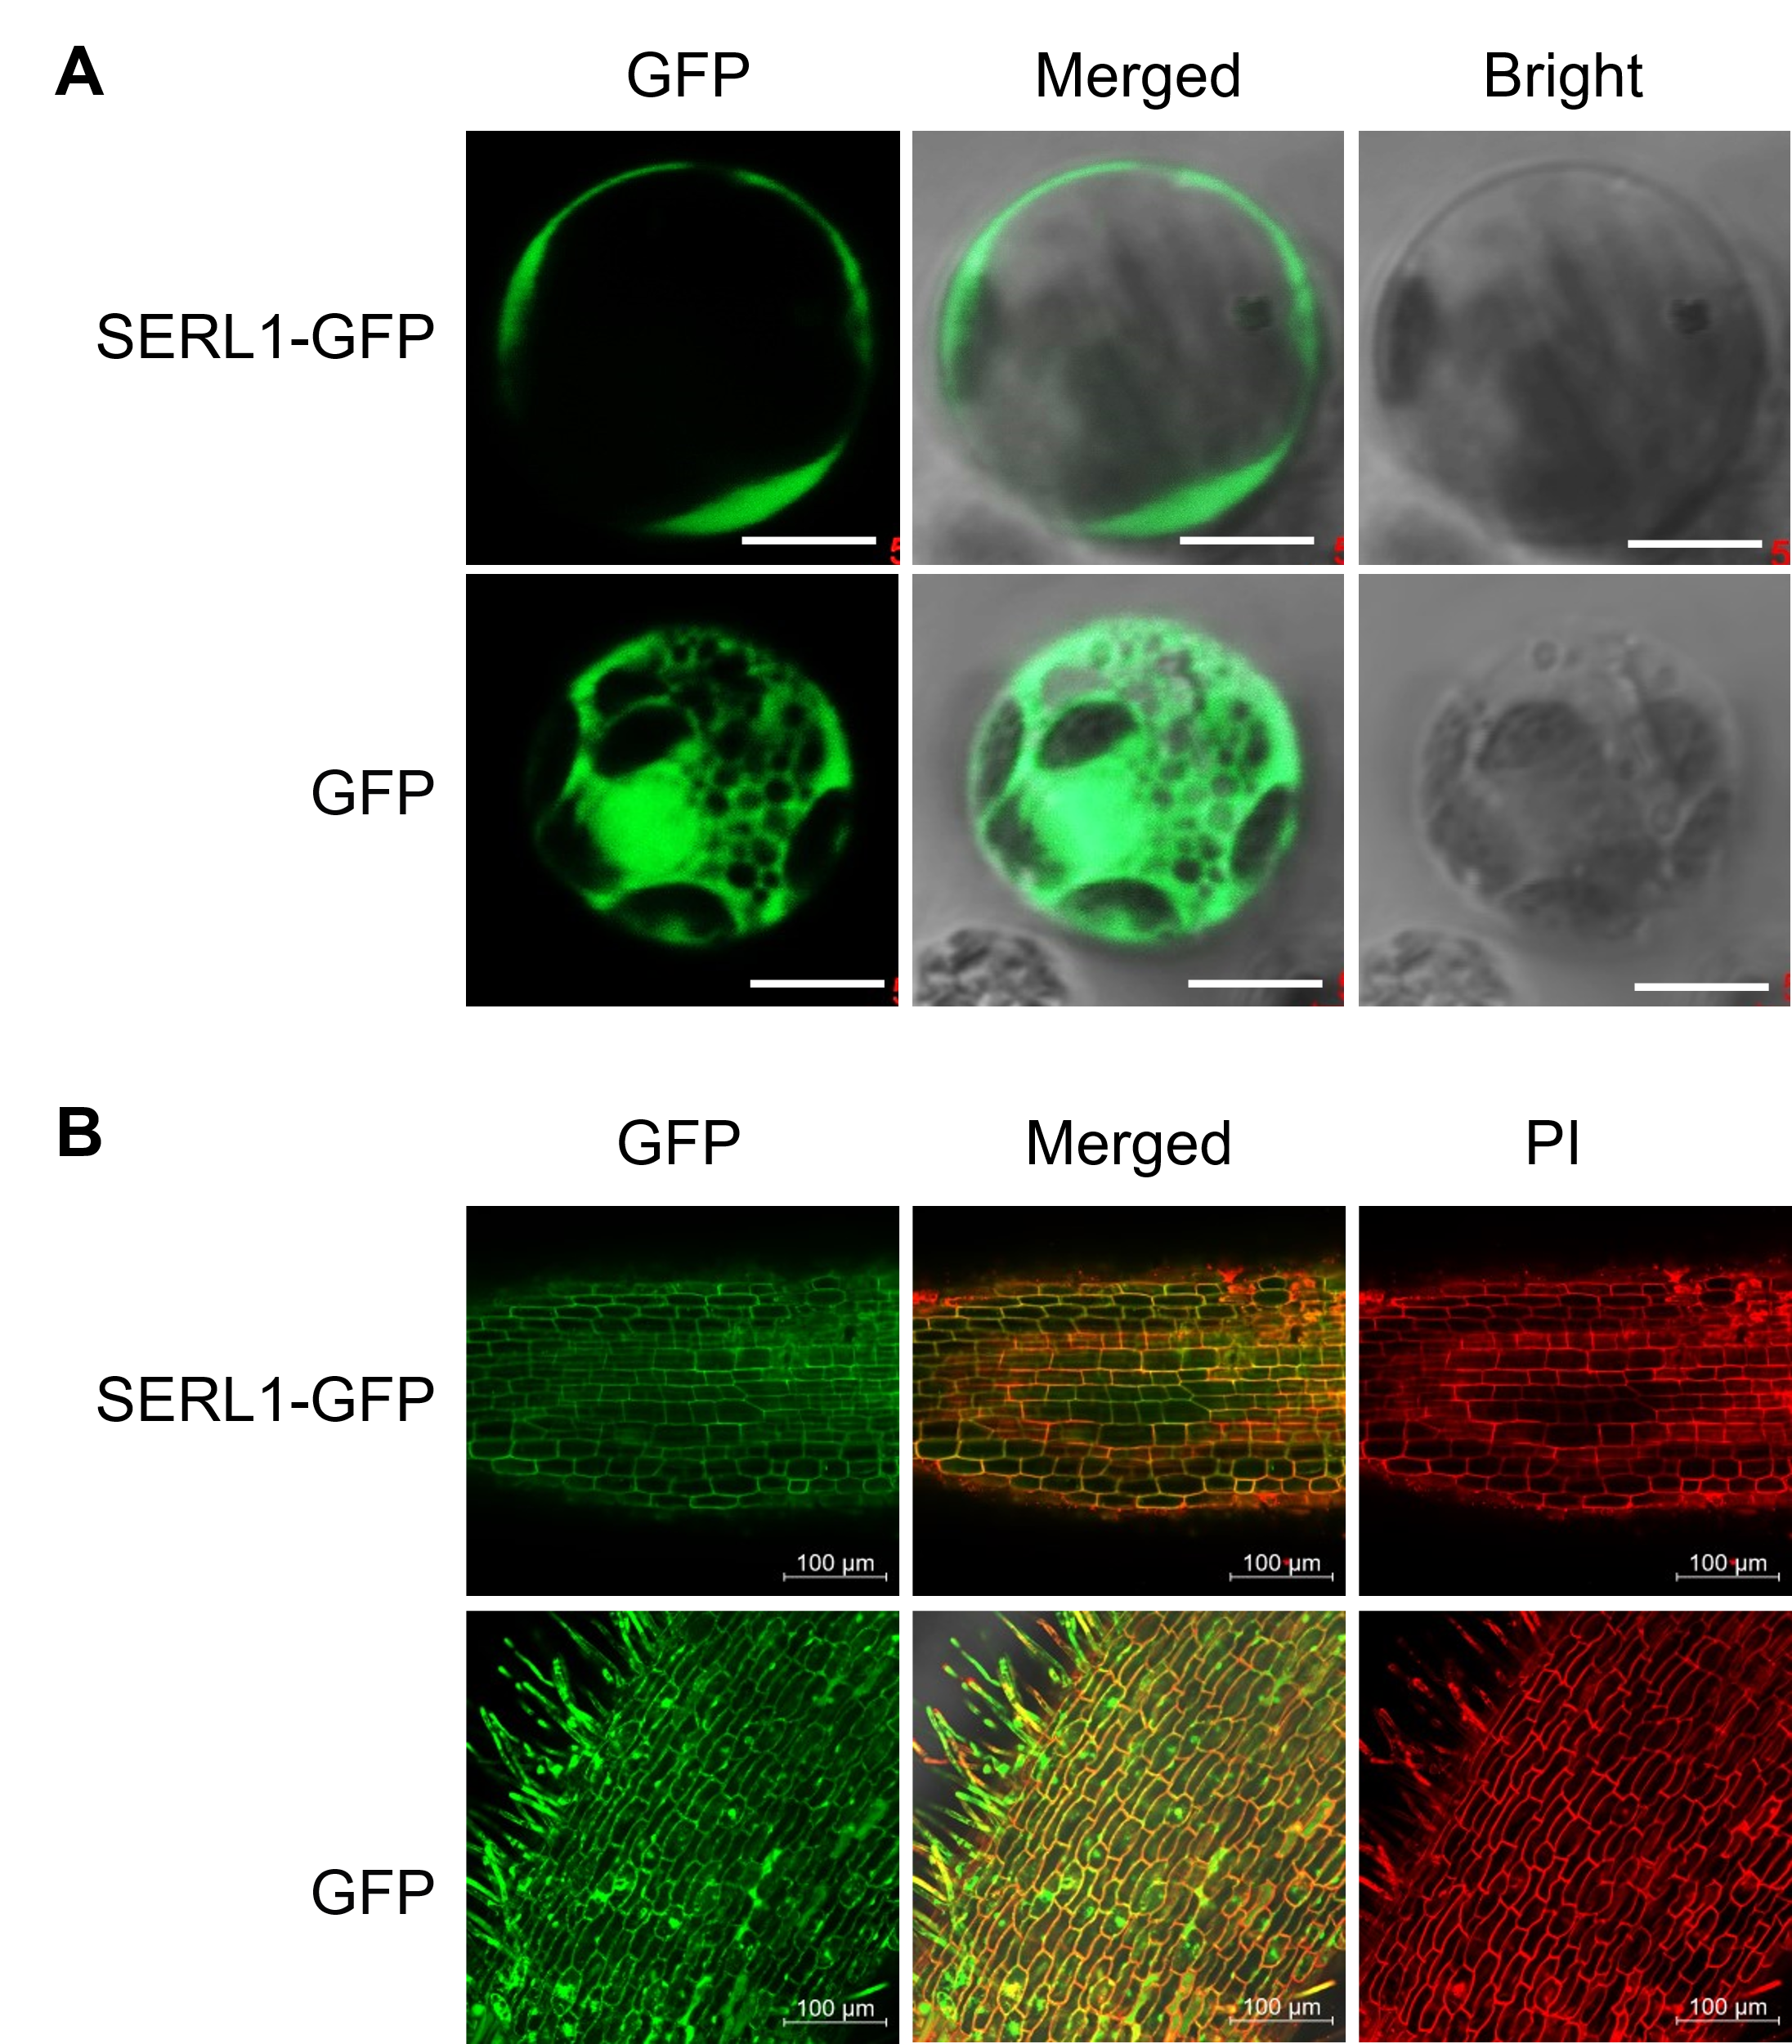


**Extended Data Fig.6**| **Analysis of subcellular localization of SERL1 protein in rice.**

**(A)** Analysis of subcellular localization of SERL1 protein by transient expression. The SERL1-green fluorescent protein (GFP) was expressed in rice protoplasts. Bars, 5 µm. **(B)** Analysis the subcellular localization of SERL1 protein in *SERL1-C* plants. The root tips of *SERL1-C* plants at three day after germination were used for analysis. The cell wall was stained with propidium iodide (PI) (Hu et al., 2017). Bars, 100 µm.


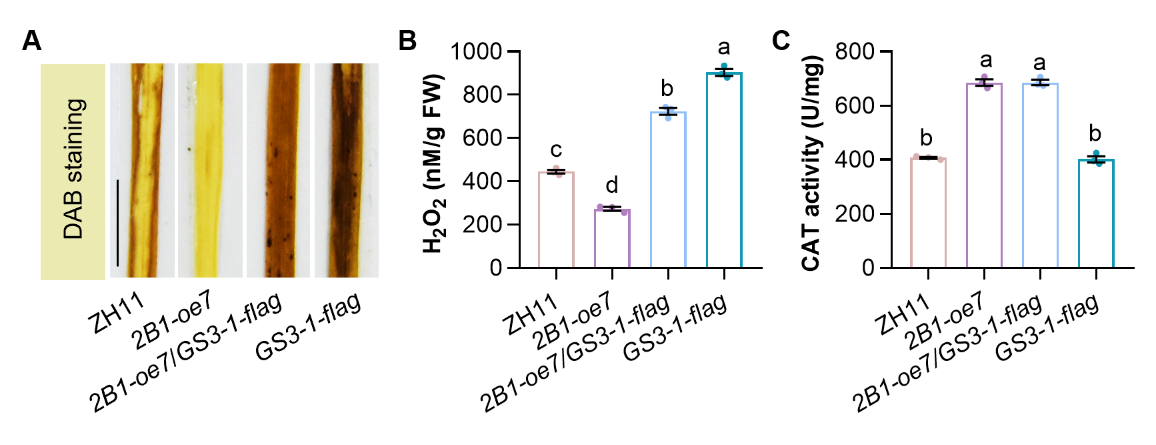
**Extended Data Fig.7**| ***OsALDH2B1* promoted H2O2 scavenging is partially dependent on *GS3*.**

**(A-C)** Visible detection of H2O2 by DAB staining **(A)**,quantification of H2O2 content **(B)** and measurement of catalase activity **(C)** in leaves of ZH11, *2B1-oe7*, *2B1-oe/GS3-1-flag*, and *GS3-1-flag* at 6 h exposed to alkaline treatment. Bar, 1 cm.

Data represent mean ± SE. n = 3. Different letters above bars indicate differences by Multiple range test at *P* < 0.05.


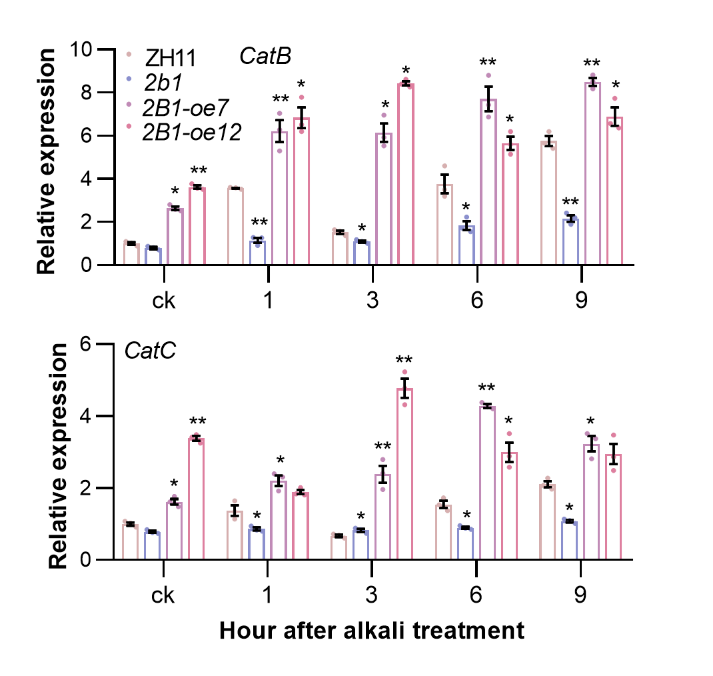
**Extended Data Fig.8**| ***CatB* and *CatC* expressions in ZH11, *2b1* and *2B1*-oe plants in response to alkaline treatment.**

10-day-old WT seedlings were treated with alkaline for the indicated times.

Data represent mean ± SE. n = 3. ***P* < 0.01 and **P* < 0.05 analyzed by Student’s *t-test*.


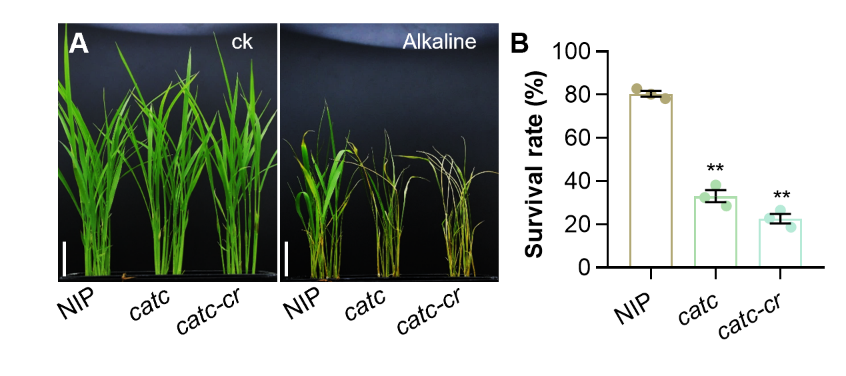
**Extended Data Fig.9**| ***CatC* mutation increases alkaline sensitivity.**

**(A and B)** Representative phenotypes **(A)** and survival rates after alkaline treatment **(B)** of ZH11 and *catc* seedlings. n = 48 from three biological repeats. Bars = 2 cm.

Data represent mean ± SE. ***P* < 0.01 analyzed by Student’s *t-test*.


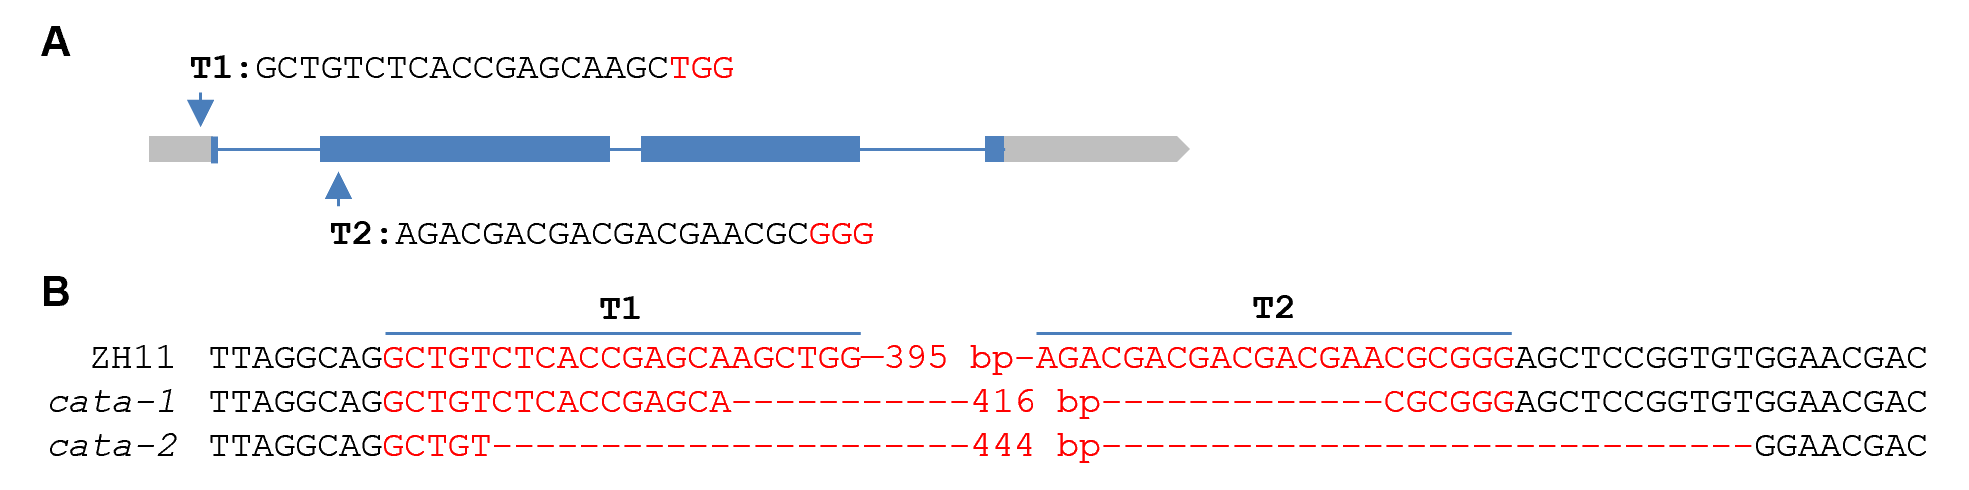


**Extended Data Fig.10**| **The *cata* mutants genotype characterization.**

**(A)** Target sites designed for genome editing of *CatA* by CRISPR/Cas9. The target site nucleotides are shown in capital letters, and the PAM site is indicated as red capital letters. **(B)** Sequence alignment of the target region showing large fragment deletion in two independent *cata* mutants.


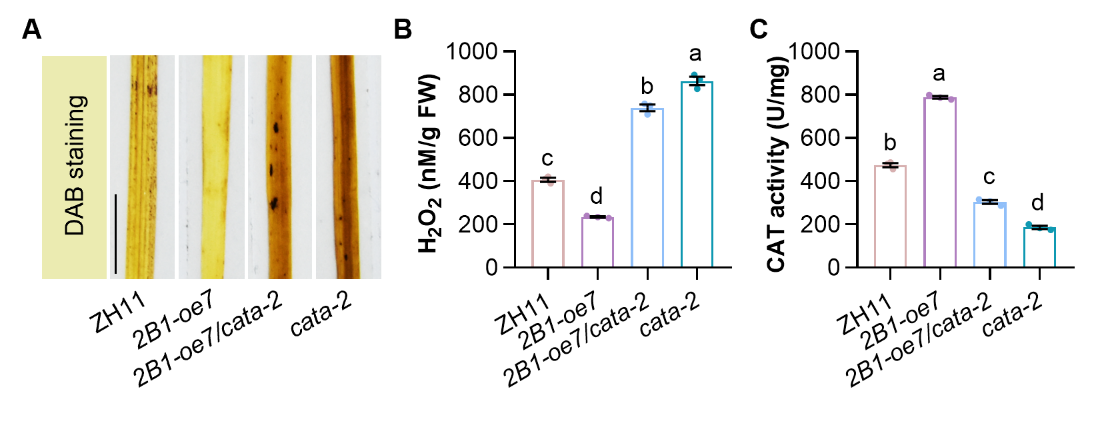
**Extended Data Fig.11**| ***CatA* is involved in *OsALDH2B1* promoted H2O2 scavenging and catalase activity.**

**(A-C)** Visible detection of H2O2 by DAB staining **(A)**,quantification of H2O2 content **(B)** and measurement of catalase activity **(C)** in leaves of ZH11, *2B1-oe7*, *2B1-oe7/cata-2*, and *cata-2* at 6 h exposed to alkaline treatment. Bar, 1 cm.

Data represent mean ± SE. n = 3. Different letters above bars indicate differences by Multiple range test at *P* < 0.05.


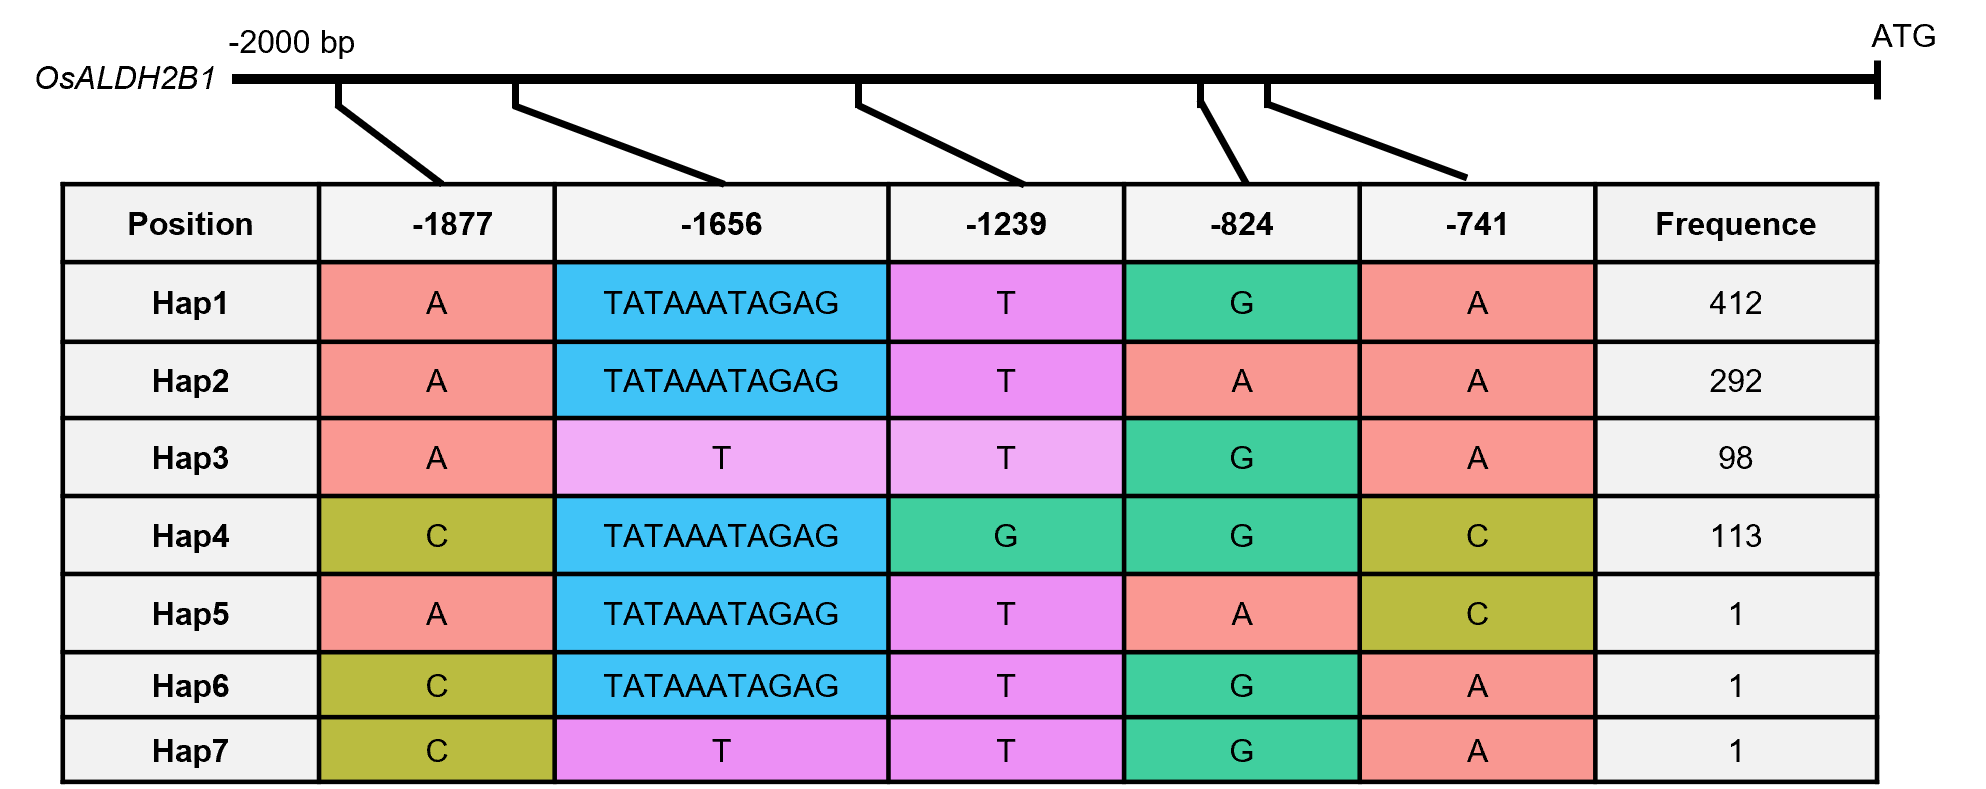
**Extended Data Fig.12**| **Haplotype analysis of the *OsALDH2B1* promoter regions from 918 cultivated rice accessions.**


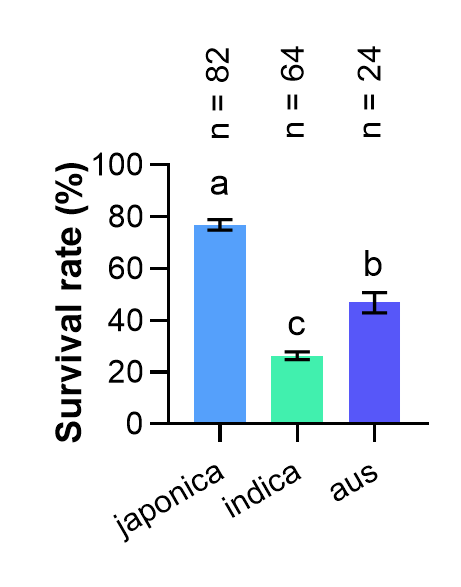
**Extended Data Fig.13**| **Analyzing the alkaline tolerance of different rice subpopulations.**

Data represent mean ± SE. Different letter above bars indicate differences by Multiple range test at *P* < 0.05.
