# Supplementary material for: Natural variations of OsALDH2B1 contribute geographical adaptation to soil pH in rice
Source: Research Square preprint supplement (doi:10.21203/rs.3.rs-7346407/v1), 2025-09-26
Supplement: Supplementary file 2 [file b9e451391fc1de5f043ea2c2.xlsx]

## Sheet: Sheet1
Supplementary Table S2. Survival rates of 170 accessions after alkali and heat stress treatment, respectively.
ID	Cultivar Name	Subpopulation	Subpopulation_ed	Location	Accession	Haptype	Survival rates after alkali treatment (%)
IRIS_313-11031	NAWAN_SATHRA_BAGAR_344	Aus	Aus	Pakistan	ERS469829	Hap1	31.25
CX227	KASALATH	Aus	Aus	Japan	ERS470551	Hap3	43.75
IRIS_313-10592	DJ69	Aus	Aus	Bangladesh	ERS469445	Hap3	68.75
IRIS_313-10593	DJ47	Aus	Aus	Bangladesh	ERS469446	Hap3	62.5
IRIS_313-10875	ARC_12021	Aus	Aus	India	ERS469679	Hap3	12.5
IRIS_313-10925	KAMULI	Aus	Aus	Nepal	ERS469724	Hap3	75
IRIS_313-11020	BAMLA_SUFFAID_320	Aus	Aus	Pakistan	ERS469817	Hap3	37.5
IRIS_313-11047	AUS_84	Aus	Aus	Bangladesh	ERS469847	Hap3	50
IRIS_313-11154	DHARIAL	Aus	Aus	Bangladesh	ERS469955	Hap3	31.25
IRIS_313-11170	LAL_TAURA	Aus	Aus	India	ERS469973	Hap3	43.75
IRIS_313-11171	M_142	Aus	Aus	India	ERS469974	Hap3	43.75
IRIS_313-11210	ZARBASAIL	Aus	Aus	Bangladesh	ERS470001	Hap3	50
IRIS_313-11213	NARIKEL_BADI	Aus	Aus	Bangladesh	ERS470005	Hap3	31.25
IRIS_313-11322	JASURE_AUS	Aus	Aus	Bangladesh	ERS470114	Hap3	62.5
IRIS_313-11557	GORIA	Aus	Aus	Bangladesh	ERS468754	Hap3	43.75
IRIS_313-11595	AMAKOYALI	Aus	Aus	India	ERS468782	Hap3	25
IRIS_313-11629	LATIJHABAR	Aus	Aus	Nepal	ERS468808	Hap3	31.25
IRIS_313-11712	GORA_DHAN_2	Aus	Aus	India	ERS468876	Hap3	31.25
IRIS_313-11982	PORASHI	Aus	Aus	Bangladesh	ERS469156	Hap3	75
IRIS_313-12002	LARA_BORO	Aus	Aus	Bangladesh	ERS469140	Hap3	25
IRIS_313-12055	LAL_MOTI	Aus	Aus	Bangladesh	ERS469188	Hap3	75
IRIS_313-12139	MANSARA_DHAN	Aus	Aus	Nepal	ERS469231	Hap3	68.75
IRIS_313-8073	DAWN_CI_9534	Aus	Aus	United States	ERS468541	Hap3	31.25
IRIS_313-8641	AUS_439	Aus	Aus	Bangladesh	ERS467862	Hap3	75
CX131	ZALE	Indica I	Indica	Myanmar	ERS470497	Hap1	37.5
CX390	Yuelianggu	Indica I	Indica	China	ERS470676	Hap1	37.5
IRIS_313-10129	SAN_SHIH_TSI	Indica I	Indica	China	ERS468157	Hap1	43.75
IRIS_313-11624	ANADI_WHITE	Indica I	Indica	Nepal	ERS468802	Hap1	31.25
IRIS_313-11667	LUO_AI_ZAO_3	Indica I	Indica	China	ERS468844	Hap1	37.5
IRIS_313-11862	HENG_YE_ZAO	Indica I	Indica	China	ERS469016	Hap1	37.5
IRIS_313-11876	AI_DA	Indica I	Indica	China	ERS469028	Hap1	12.5
IRIS_313-11968	ZHAO_DAN_AI	Indica I	Indica	China	ERS469114	Hap1	25
IRIS_313-8380	SAN_CHIAO_TSWEN	Indica I	Indica	China	ERS467935	Hap1	43.75
IRIS_313-9324	CHIH_SHEN_LI	Indica I	Indica	China	ERS468058	Hap1	18.75
CX121	Guang122	Indica II	Indica	China	ERS470487	Hap1	18.75
CX237	B6136-3-TB-0-1-5	Indica II	Indica	Philippines	ERS470561	Hap1	18.75
CX238	BW311-9	Indica II	Indica	Philippines	ERS470562	Hap1	31.25
CX26	Amol3(Sana)	Indica II	Indica	Iran	ERS470574	Hap1	25
CX281	IR68897B	Indica II	Indica	Philippines	ERS470592	Hap1	18.75
CX360	Y075	Indica II	Indica	None	ERS470645	Hap1	37.5
CX362	YZX1	Indica II	Indica	None	ERS470647	Hap1	31.25
CX370	Chenghui_727	Indica II	Indica	China	ERS470656	Hap1	50
CX381	Adny_11	Indica II	Indica	None	ERS470667	Hap1	25
CX399	Matatag2	Indica II	Indica	Philippines	ERS470684	Hap1	12.5
CX75	At354	Indica II	Indica	Sri Lanka	ERS470728	Hap1	25
CX82	X21	Indica II	Indica	Vietnam	ERS470735	Hap1	31.25
CX85	C71	Indica II	Indica	Vietnam	ERS470738	Hap1	18.75
IRIS_313-10167	IR_56	Indica II	Indica	Philippines	ERS468164	Hap1	18.75
IRIS_313-10287	UQUIHUA	Indica II	Indica	Peru	ERS468230	Hap1	25
IRIS_313-10397	IRGA_318-11-6-9-2B	Indica II	Indica	Colombia	ERS467924	Hap1	18.75
IRIS_313-11960	PORONG	Indica II	Indica	Indonesia	ERS469105	Hap1	18.75
IRIS_313-12234	ANLINGWUBAILI	Indica II	Indica	China	ERS469271	Hap1	25
IRIS_313-7826	WAS_33-B-B-15-1-4-5	Indica II	Indica	Senegal	ERS468566	Hap1	12.5
IRIS_313-10544	DONGREM	Indica III	Indica	India	ERS469404	Hap1	43.75
IRIS_313-11101	NONE	Indica III	Indica	Liberia	ERS469897	Hap1	31.25
IRIS_313-11288	ARC_18434	Indica III	Indica	India	ERS470077	Hap1	18.75
IRIS_313-8450	498-2A_BR_8	Indica III	Indica	India	ERS467942	Hap1	43.75
IRIS_313-9970	RACE_PERUMAL	Indica III	Indica	Sri Lanka	ERS468135	Hap1	12.5
CX119	P59279	Indica Intermediate	Indica	None	ERS470484	Hap1	31.25
CX182	SLG1	Indica Intermediate	Indica	Japan	ERS470531	Hap1	18.75
CX221	Zhongyouzao_81	Indica Intermediate	Indica	China	ERS470548	Hap1	25
CX265	MONOLAYA	Indica Intermediate	Indica	United States	ERS470577	Hap1	18.75
CX319	Mengguandamagu	Indica Intermediate	Indica	China	ERS470617	Hap1	18.75
CX64	IRAT_352	Indica Intermediate	Indica	Philippines	ERS470717	Hap1	18.75
IRIS_313-10234	PSBRC50	Indica Intermediate	Indica	Philippines	ERS468178	Hap1	37.5
IRIS_313-10404	K_479-2-3	Indica Intermediate	Indica	India	ERS467927	Hap1	37.5
IRIS_313-10835	PERUNEL_0-69-18	Indica Intermediate	Indica	India	ERS469638	Hap1	18.75
IRIS_313-11041	POONGAR	Indica Intermediate	Indica	India	ERS469840	Hap1	18.75
IRIS_313-11255	ARC_7056	Indica Intermediate	Indica	India	ERS470050	Hap1	43.75
IRIS_313-11731	QING_TAI_AI	Indica Intermediate	Indica	China	ERS468894	Hap1	12.5
IRIS_313-12329	CHAO_DO	Indica Intermediate	Indica	Laos	ERS469333	Hap1	37.5
IRIS_313-9023	CR60-10	Indica Intermediate	Indica	India	ERS468014	Hap1	25
IRIS_313-9503	BINUHANGIN	Indica Intermediate	Indica	Philippines	ERS468076	Hap1	12.5
CX230	IR64-IL	Indica II	Indica	China	ERS470554	Hap2	25
CX377	NERICA-L-27	Indica II	Indica	Africa	ERS470663	Hap2	18.75
CX382	Kogomg_1-1	Indica II	Indica	None	ERS470668	Hap2	12.5
CX403	IR64a	Indica II	Indica	Philippines	ERS470689	Hap2	50
CX76	BG304	Indica II	Indica	Sri Lanka	ERS470729	Hap2	6.25
IRIS_313-10289	ARAURE_1	Indica II	Indica	Venezuela	ERS467914	Hap2	25
IRIS_313-7832	WAS_63-22-5-9-10-1	Indica II	Indica	Senegal	ERS468550	Hap2	37.5
IRIS_313-11129	HAORU	Indica III	Indica	Myanmar	ERS469928	Hap2	25
CX219	FL478	Indica Intermediate	Indica	Philippines	ERS470545	Hap2	31.25
CX240	Carijo	Indica Intermediate	Indica	Brazil	ERS470564	Hap2	12.5
IRIS_313-10026	KITRANA_1007	Indica Intermediate	Indica	Madagascar	ERS468144	Hap2	6.25
IRIS_313-10113	EX_FOILAEIN(NAPUTO)	Indica Intermediate	Indica	Mozambique	ERS468155	Hap2	6.25
IRIS_313-7650	BOTOHAVANA_139	Indica Intermediate	Indica	Madagascar	ERS468584	Hap2	56.25
IRIS_313-7654	BOUAKE_189	Indica Intermediate	Indica	Ivory Coast	ERS468579	Hap2	25
IRIS_313-9388	VARY_MALADY_MENA	Indica Intermediate	Indica	Madagascar	ERS467841	Hap2	37.5
CX353	CAU1	Japonica Intermediate	Japonica	China	ERS470638	Hap2	56.25
IRIS_313-10119	GITANO	Japonica Intermediate	Japonica	Italy	ERS468363	Hap2	81.25
IRIS_313-10258	BULI_INIA	Japonica Intermediate	Japonica	Chile	ERS467900	Hap2	93.75
IRIS_313-10834	IARI_11387	Japonica Intermediate	Japonica	India	ERS469637	Hap2	50
IRIS_313-12340	Nyao	Japonica Intermediate	Japonica	Laos	ERS469340	Hap2	75
IRIS_313-12342	Hai_na	Japonica Intermediate	Japonica	Laos	ERS469343	Hap2	81.25
IRIS_313-12352	MEE	Japonica Intermediate	Japonica	Laos	ERS469352	Hap2	56.25
IRIS_313-8027	ANSEATICO	Japonica Intermediate	Japonica	Italy	ERS468533	Hap2	62.5
IRIS_313-8139	SANDOCA	Japonica Intermediate	Japonica	Portugal	ERS468536	Hap2	87.5
IRIS_313-8145	SUPER	Japonica Intermediate	Japonica	Portugal	ERS468476	Hap2	93.75
IRIS_313-8158	CT_23	Japonica Intermediate	Japonica	Colombia	ERS468637	Hap2	56.25
IRIS_313-8159	CT_36	Japonica Intermediate	Japonica	Colombia	ERS468638	Hap2	50
IRIS_313-8177	AUGUSTO	Japonica Intermediate	Japonica	Italy	ERS468529	Hap2	68.75
IRIS_313-9193	EAN_4_C_1	Japonica Intermediate	Japonica	Brazil	ERS468323	Hap2	62.5
CX49	NAN-29-2	Temperate Japonica	Japonica	China	ERS470698	Hap2	93.75
IRIS_313-8109	CAMPINO	Temperate Japonica	Japonica	Portugal	ERS468471	Hap2	87.5
IRIS_313-8136	SAFARI	Temperate Japonica	Japonica	Portugal	ERS468492	Hap2	68.75
IRIS_313-8137	SAGRES	Temperate Japonica	Japonica	Portugal	ERS468557	Hap2	81.25
IRIS_313-8149	TOPAZIO	Temperate Japonica	Japonica	Portugal	ERS468499	Hap2	100
IRIS_313-8218	SAKHA_103	Temperate Japonica	Japonica	Egypt	ERS468689	Hap2	81.25
CX129	MOLOK	Tropical Japonica	Japonica	Indonesia	ERS470494	Hap2	50
CX355	Yunlu_102	Tropical Japonica	Japonica	China	ERS470640	Hap2	56.25
CX371	NERICA_1	Tropical Japonica	Japonica	Africa	ERS470657	Hap2	43.75
CX374	NERICA_9	Tropical Japonica	Japonica	Africa	ERS470660	Hap2	87.5
IRIS_313-10051	TSIVIMBININA	Tropical Japonica	Japonica	Madagascar	ERS467905	Hap2	87.5
IRIS_313-10075	SANGOKU	Tropical Japonica	Japonica	Japan	ERS468420	Hap2	56.25
IRIS_313-10272	COLOMBIA_1	Tropical Japonica	Japonica	Colombia	ERS467805	Hap2	50
IRIS_313-10644	BUSIYETAN	Tropical Japonica	Japonica	Philippines	ERS469466	Hap2	81.25
IRIS_313-10708	B_6311_A_5553-16-2	Tropical Japonica	Japonica	United States	ERS469533	Hap2	56.25
IRIS_313-10743	SERAJU	Tropical Japonica	Japonica	Indonesia	ERS469551	Hap2	37.5
IRIS_313-10794	MENDUNGAN	Tropical Japonica	Japonica	Indonesia	ERS469603	Hap2	68.75
IRIS_313-10796	MOLOG	Tropical Japonica	Japonica	Indonesia	ERS469605	Hap2	56.25
IRIS_313-10827	BINARITOS	Tropical Japonica	Japonica	Philippines	ERS469629	Hap2	81.25
IRIS_313-10888	ARC_12726	Tropical Japonica	Japonica	India	ERS469693	Hap2	81.25
IRIS_313-10893	ARC_13156	Tropical Japonica	Japonica	India	ERS469699	Hap2	56.25
IRIS_313-10920	PINIDWA_QAN_QIPUGO_QELEK	Tropical Japonica	Japonica	Philippines	ERS469718	Hap2	75
IRIS_313-10953	PADI_ABUNG_KUNING	Tropical Japonica	Japonica	Indonesia	ERS469754	Hap2	75
IRIS_313-11428	MARANHAO_BRANCO	Tropical Japonica	Japonica	Brazil	ERS468717	Hap2	87.5
IRIS_313-11435	MONMINEUPLEU	Tropical Japonica	Japonica	Ivory Coast	ERS468652	Hap2	93.75
IRIS_313-11465	DINORADO	Tropical Japonica	Japonica	Philippines	ERS468680	Hap2	68.75
IRIS_313-11673	BURI-BURING	Tropical Japonica	Japonica	Philippines	ERS468849	Hap2	81.25
IRIS_313-11929	GILINGAN_MARANGRAS	Tropical Japonica	Japonica	Philippines	ERS469074	Hap2	62.5
IRIS_313-7838	62667	Tropical Japonica	Japonica	Senegal	ERS468599	Hap2	75
IRIS_313-8061	75_UPLA	Tropical Japonica	Japonica	Argentina	ERS468627	Hap2	93.75
IRIS_313-8102	BLUE_BONNET	Tropical Japonica	Japonica	United States	ERS468537	Hap2	43.75
IRIS_313-8180	DELLMONT	Tropical Japonica	Japonica	United States	ERS468521	Hap2	68.75
IRIS_313-8209	ALEXANDROS	Tropical Japonica	Japonica	Greece	ERS468463	Hap2	75
IRIS_313-8431	BOCAO	Tropical Japonica	Japonica	Philippines	ERS468454	Hap2	50
IRIS_313-8523	OS4	Tropical Japonica	Japonica	Nigeria	ERS467890	Hap2	93.75
IRIS_313-8572	ONOY	Tropical Japonica	Japonica	Philippines	ERS468438	Hap2	43.75
IRIS_313-8768	MOROFIN	Tropical Japonica	Japonica	Ivory Coast	ERS468381	Hap2	75
IRIS_313-9050	ANGKARONG	Tropical Japonica	Japonica	Malaysia	ERS468448	Hap2	93.75
IRIS_313-9389	KINANDANG_BUSIKSIK	Tropical Japonica	Japonica	Philippines	ERS468397	Hap2	87.5
IRIS_313-9550	VEGOLD	Tropical Japonica	Japonica	United States	ERS468404	Hap2	56.25
IRIS_313-9745	VARY_MALADY	Tropical Japonica	Japonica	Madagascar	ERS468406	Hap2	87.5
IRIS_313-10295	PDR_34-2-1-2	Japonica Intermediate	Japonica	Pakistan	ERS468191	Hap4	37.5
IRIS_313-7850	BODA_148-3	Japonica Intermediate	Japonica	Madagascar	ERS468614	Hap4	93.75
IRIS_313-8444	M_203	Japonica Intermediate	Japonica	United States	ERS468316	Hap4	87.5
IRIS_313-9980	FORTUNA_INIA	Japonica Intermediate	Japonica	Argentina	ERS468411	Hap4	87.5
CX251	Xudao_4_	Temperate Japonica	Japonica	China	ERS470573	Hap4	87.5
CX356	Yandao_8__	Temperate Japonica	Japonica	China	ERS470641	Hap4	93.75
CX380	Yandao_9	Temperate Japonica	Japonica	China	ERS470666	Hap4	81.25
CX384	Fengza	Temperate Japonica	Japonica	China	ERS470670	Hap4	81.25
CX391	YJ30	Temperate Japonica	Japonica	China	ERS470677	Hap4	81.25
CX397	Nangeng_46_(Soft_Rice)	Temperate Japonica	Japonica	China	ERS470683	Hap4	75
CX74	JP-5	Temperate Japonica	Japonica	Pakistan	ERS470727	Hap4	87.5
IRIS_313-10059	DACHEONGBYEO	Temperate Japonica	Japonica	South Korea	ERS468355	Hap4	93.75
IRIS_313-10084	SENIA	Temperate Japonica	Japonica	Spain	ERS468357	Hap4	81.25
IRIS_313-10430	GINMASARI	Temperate Japonica	Japonica	Japan	ERS469369	Hap4	100
IRIS_313-10567	AIKAWA_44	Temperate Japonica	Japonica	Japan	ERS469425	Hap4	100
IRIS_313-10568	OITA-MII_120	Temperate Japonica	Japonica	Japan	ERS469426	Hap4	93.75
IRIS_313-10618	CHINES	Temperate Japonica	Japonica	None	ERS469483	Hap4	93.75
IRIS_313-11202	4583	Temperate Japonica	Japonica	China	ERS469993	Hap4	100
IRIS_313-11571	BAI_MANG_AI_ZHONG	Temperate Japonica	Japonica	China	ERS468765	Hap4	68.75
IRIS_313-11829	MUNJI	Temperate Japonica	Japonica	Pakistan	ERS468980	Hap4	100
IRIS_313-11890	C_722323	Temperate Japonica	Japonica	China	ERS469088	Hap4	100
IRIS_313-8087	FRANCES	Temperate Japonica	Japonica	Spain	ERS468497	Hap4	68.75
IRIS_313-8105	THAIPERLA	Temperate Japonica	Japonica	United States	ERS468496	Hap4	93.75
IRIS_313-8204	S_102	Temperate Japonica	Japonica	United States	ERS468515	Hap4	100
IRIS_313-9081	TAKAO_MOCHI	Temperate Japonica	Japonica	Japan	ERS467898	Hap4	93.75
IRIS_313-9724	AI_DA_ZHONG	Temperate Japonica	Japonica	China	ERS467846	Hap4	100
IRIS_313-9814	AMARELO	Temperate Japonica	Japonica	Hungary	ERS467800	Hap4	100
