# Supplementary material for: Natural variations of OsALDH2B1 contribute geographical adaptation to soil pH in rice
Source: Research Square preprint supplement (doi:10.21203/rs.3.rs-7346407/v1), 2025-09-26
Supplement: Supplementary file 3 [file c022ebd10b633bcaf8207b22.xlsx]

## Sheet: Table S1
Supplementary Table S1. Detail information of 918 accessions used for OsALDH2B1 haplotype analysis.
ID	Cultivar Name	Subpopulation	Location	Accession	Haptype			indica	japonica	aus	other	total
IRIS_313-11031	NAWAN_SATHRA_BAGAR_344	Aus	Pakistan	ERS469829	Hap1		Hap1	390	5	1	16	412
C001	Sadu-cho	Indica I	Philippines	SRR1239601	Hap1		Hap2	61	194	10	27	292
C019	Aijiaonante	Indica I	Guangdong	SRR1239619	Hap1		Hap3	1	111	0	1	113
C020	Guangluai-4-1	Indica I	Hunan	SRR1239620	Hap1		Hap4	4	0	91	3	98
C021	xiangaizao10	Indica I	Unknown	SRR1239621	Hap1			456	310	102	47	915
C022	JinnanteB	Indica I	Hunan	SRR1239622	Hap1
C024	zhenshan97B-1	Indica I	Jiangxi	SRR1239624	Hap1			Hap1	Hap2	Hap3	Hap4
C033	Lucaihao	Indica I	Fujian	SRR1239633	Hap1		indica	390	61	1	4	456
C037	Chengduai3hao	Indica I	Sichuan	SRR1239637	Hap1		japonica	5	194	111	0	310
C039	Gongju73	Indica I	Yunnan	SRR1239639	Hap1		aus	1	10	0	91	102
C040	Jiabala	Indica I	Xizang	SRR1239640	Hap1		other	16	27	1	3	47
C041	Taishannuo	Indica I	Guangdong	SRR1239641	Hap1		total	412	292	113	98	915
C043	Huke3hao	Indica I	Shanghai	SRR1239643	Hap1
C047	Hanmadao-2	Indica I	Taiwan	SRR1239647	Hap1
C055	Sanbaili	Indica I	Hunan	SRR1239655	Hap1
C058	Liusha1hao	Indica I	Guangxi; China	SRR1239658	Hap1
C059	Bawangbian1	Indica I	Hubei	SRR1239659	Hap1
C060	Dongtingwanxian	Indica I	Hunan	SRR1239660	Hap1
C062	WH62	Indica I	Henan	SRR1239662	Hap1
C066	Liushizao	Indica I	Sichuan	SRR1239666	Hap1
C072	Nantehao	Indica I	Jiangxi	SRR1239672	Hap1
C073	Esiniu	Indica I	Guangdong	SRR1239673	Hap1
C076	Benbanggu-1	Indica I	Sichuan	SRR1239676	Hap1
C077	Benbanggu-2	Indica I	Yunnan	SRR1239677	Hap1
C080	Hanmadao-1	Indica I	Henan	SRR1239680	Hap1
C081	Heidu4	Indica I	Guangdong	SRR1239681	Hap1
C088	Nangaogu-2	Indica I	Jiangsu	SRR1239688	Hap1
C091	Meihuanuo-1	Indica I	Sichuan	SRR1239691	Hap1
C092	Meihuanuo-2	Indica I	Yunnan	SRR1239692	Hap1
C095	Xiaohonggu	Indica I	Yunnan	SRR1239695	Hap1
C104	Mamagu-1	Indica I	Sichuan	SRR1239704	Hap1
C108	Mamagu-2	Indica I	Sichuan	SRR1239708	Hap1
C109	WH109	Indica I	Yunnan	SRR1239709	Hap1
C110	Xianggu	Indica I	Yunnan	SRR1239710	Hap1
C112	Jinnante43B	Indica I	Hunan	SRR1239712	Hap1
C122	Aituogu151	Indica I	Sichuan	SRR1239722	Hap1
C125	Jiefangxian	Indica I	Jiangxi	SRR1239725	Hap1
C127	Baikehualuo	Indica I	Guangdong	SRR1239727	Hap1
C128	Liuyezhan	Indica I	Hubei	SRR1239728	Hap1
C131	Xuanenchangtan	Indica I	Hubei	SRR1239731	Hap1
C135	Xibaizhan	Indica I	Sichuan	SRR1239735	Hap1
C136	Zegu	Indica I	Guizhou	SRR1239736	Hap1
C139	WH139	Indica I	Yunnan	SRR1239739	Hap1
C140	Wuzuhonggu	Indica I	Yunnan	SRR1239740	Hap1
C141	Nangaogu-1	Indica I	Yunnan	SRR1239741	Hap1
C143	Qitougu	Indica I	Yunnan	SRR1239743	Hap1
C145	Zhenshan97B	Indica I	Zhejiang	SRR1239745	Hap1
C151	Nanjing11	Indica I	Jiangsu	SRR1239751	Hap1
C155	Erjiunan1hao	Indica I	Zhejiang	SRR1239755	Hap1
C156	ChaoyangyihaoB	Indica I	Hunan	SRR1239756	Hap1
C157	L301B	Indica I	Hunan	SRR1239757	Hap1
C158	Guangluai15	Indica I	Guangxi	SRR1239758	Hap1
C159	ZhuzhenB	Indica I	Hunan	SRR1239759	Hap1
C161	Gzhenshan97B	Indica I	Sichuan	SRR1239761	Hap1
C165	Nanjing11-2	Indica I	Jiangsu	SRR1239765	Hap1
C170	Xiangwanxian1hao	Indica I	Hunan	SRR1239770	Hap1
C173	Aimakang	Indica I	Sichuan	SRR1239773	Hap1
C178	Aimi	Indica I	Jiangxi	SRR1239778	Hap1
C180	Wanlixian	Indica I	Hunan	SRR1239780	Hap1
C182	Hengxianliangchun	Indica I	Guangxi	SRR1239782	Hap1
C183	Leihuozhan	Indica I	Anhui	SRR1239783	Hap1
C184	Baikezaohe	Indica I	Hunan	SRR1239784	Hap1
C190	Xiangdao	Indica I	Henan	SRR1239790	Hap1
C193	Zhongnong4hao	Indica I	Sichuan	SRR1239793	Hap1
C197	Maweinian	Indica I	Guizhou	SRR1239797	Hap1
C199	Beizinuo	Indica I	Yunnan	SRR1239799	Hap1
C200	Biwusheng	Indica I	Yunnan	SRR1239800	Hap1
C202	Xiaobaimi	Indica I	Guizhou	SRR1239802	Hap1
C203	Zaoxian240	Indica I	Anhui	SRR1239803	Hap1
CX101	Hei_Mi_Chan	Indica I	China	ERS470466	Hap1
CX102	Tek_Si_Chut	Indica I	China	ERS470467	Hap1
CX114	Guang_Lu_Ai_4	Indica I	China	ERS470479	Hap1
CX131	ZALE	Indica I	Myanmar	ERS470497	Hap1
CX133	Zhengshan97	Indica I	China	ERS470499	Hap1
CX162	TN1	Indica I	China	ERS470527	Hap1
CX390	Yuelianggu	Indica I	China	ERS470676	Hap1
CX88	Huanyangnian	Indica I	China	ERS470741	Hap1
IRIS_313-10129	SAN_SHIH_TSI	Indica I	China	ERS468157	Hap1
IRIS_313-10452	LING_TA_150	Indica I	China	ERS469364	Hap1
IRIS_313-10503	HA-GOO	Indica I	China	ERS469380	Hap1
IRIS_313-11152	AC74	Indica I	India	ERS469953	Hap1
IRIS_313-11158	NAN-ERH-AI_5	Indica I	China	ERS469959	Hap1
IRIS_313-11624	ANADI_WHITE	Indica I	Nepal	ERS468802	Hap1
IRIS_313-11666	LONG_GE_33	Indica I	China	ERS468843	Hap1
IRIS_313-11667	LUO_AI_ZAO_3	Indica I	China	ERS468844	Hap1
IRIS_313-11799	E_ZI_110	Indica I	China	ERS469024	Hap1
IRIS_313-11806	78_XUAN_WU	Indica I	China	ERS468955	Hap1
IRIS_313-11859	DONG_DU	Indica I	China	ERS469012	Hap1
IRIS_313-11861	HEI_YAN_ZHAN	Indica I	China	ERS469015	Hap1
IRIS_313-11862	HENG_YE_ZAO	Indica I	China	ERS469016	Hap1
IRIS_313-11876	AI_DA	Indica I	China	ERS469028	Hap1
IRIS_313-11881	LIU_TIAO_XIAN	Indica I	China	ERS469032	Hap1
IRIS_313-11911	YUN_NAN_ZHAN	Indica I	China	ERS469054	Hap1
IRIS_313-11952	QI_YUE_ZHAN	Indica I	China	ERS469097	Hap1
IRIS_313-11968	ZHAO_DAN_AI	Indica I	China	ERS469114	Hap1
IRIS_313-8380	SAN_CHIAO_TSWEN	Indica I	China	ERS467935	Hap1
IRIS_313-8433	CHANG_LE_SAN_SHU_ZAO	Indica I	China	ERS467939	Hap1
IRIS_313-9324	CHIH_SHEN_LI	Indica I	China	ERS468058	Hap1
IRIS_313-9469	TSAO_SHENG_LI_1	Indica I	China	ERS468072	Hap1
IRIS_313-9708	TSAI-YUAN-CHON	Indica I	China	ERS468107	Hap1
IRIS_313-9723	AI-ZI-HUNG	Indica I	China	ERS468109	Hap1
IRIS_313-9730	BA_SHI_ZAO	Indica I	China	ERS468111	Hap1
W001	Mayang_Khang	Indica I	Indonesia	SRR1239804	Hap1
W026	Won_Son_Zo_No._11	Indica I	Korea	SRR1239829	Hap1
W031	Sipirasikkam	Indica I	Indonesia	SRR1239834	Hap1
W032	TJ	Indica I	Guyana	SRR1239835	Hap1
W033	PD_46	Indica I	Sri Lanka	SRR1239836	Hap1
W036	Chun_118-33	Indica I	China	SRR1239839	Hap1
W039	Nam_Dawk_Mai	Indica I	Thailand	SRR1239842	Hap1
W058	Kao_Chio_Lin_Chou	Indica I	Taiwan	SRR1239861	Hap1
W080	UZ_ROS_59	Indica I	Uzbekistan	SRR1239883	Hap1
W087	YOU-I_B	Indica I	China	SRR1239890	Hap1
W124	Kin_Shan_Zim	Indica I	China	SRR1239927	Hap1
W126	Pan_Ju	Indica I	China	SRR1239929	Hap1
W132	Hsin_Hsing_Pai_Ku	Indica I	Taiwan	SRR1239935	Hap1
W138	4595	Indica I	China	SRR1239941	Hap1
W144	Ao_Chiu_2_Hao	Indica I	China	SRR1239947	Hap1
W156	Gumei2hao	Indica I	Sichuan	SRR1239959	Hap1
W204	Mengguandamagu	Indica I	Unknown	SRR1240007	Hap1
W205	Pengshantieganzhan	Indica I	Unknown	SRR1240008	Hap1
W210	Khao_Daeng	Indica I	Philippines	SRR1240013	Hap1
W235	Suiyangnian	Indica I	Unknown	SRR1240038	Hap1
W247	Yenfangghu	Indica I	Unknown	SRR1240050	Hap1
W248	Heimichut	Indica I	Unknown	SRR1240051	Hap1
W262	Bintapan	Indica I	Philippines	SRR1240065	Hap1
W274	Er_chiu_ching	Indica I	China	SRR1240077	Hap1
W318	Qiuqianbai	Indica I	Anhui	SRR1240121	Hap1
C011	MILYANG_23	Indica II	Taiwan	SRR1239611	Hap1
C050	Chengnongshuijing	Indica II	Sichuan	SRR1239650	Hap1
C068	Taizhongxianxuan2	Indica II	Taiwan	SRR1239668	Hap1
C069	Dangyu5hao	Indica II	Anhui	SRR1239669	Hap1
C115	WH115	Indica II	Hunan	SRR1239715	Hap1
C118	Gu154	Indica II	Unknown	SRR1239718	Hap1
C147	Minghui63	Indica II	Unknown	SRR1239747	Hap1
C148	9311	Indica II	Hunan	SRR1239748	Hap1
C163	Zaoshuxianghei	Indica II	Guangxi	SRR1239763	Hap1
C164	IR661-1	Indica II	Unknown	SRR1239764	Hap1
C174	JWR221	Indica II	Unknown	SRR1239774	Hap1
CX121	Guang122	Indica II	China	ERS470487	Hap1
CX122	Tai-Zhong-Xian_10	Indica II	China	ERS470488	Hap1
CX126	IRBB60	Indica II	Philippines	ERS470492	Hap1
CX134	IRBB7	Indica II	Philippines	ERS470500	Hap1
CX237	B6136-3-TB-0-1-5	Indica II	Philippines	ERS470561	Hap1
CX238	BW311-9	Indica II	Philippines	ERS470562	Hap1
CX249	2004	Indica II	China	ERS470570	Hap1
CX26	Amol3(Sana)	Indica II	Iran	ERS470574	Hap1
CX281	IR68897B	Indica II	Philippines	ERS470592	Hap1
CX291	D15	Indica II	China	ERS470601	Hap1
CX296	IR74	Indica II	Philippines	ERS470602	Hap1
CX314	117	Indica II	China	ERS470612	Hap1
CX343	Wanxian_77	Indica II	China	ERS470627	Hap1
CX348	Zhonghua_1__	Indica II	China	ERS470632	Hap1
CX360	Y075	Indica II	None	ERS470645	Hap1
CX361	G341	Indica II	None	ERS470646	Hap1
CX362	YZX1	Indica II	None	ERS470647	Hap1
CX369	IRBB62	Indica II	Philippines	ERS470654	Hap1
CX370	Chenghui_727	Indica II	China	ERS470656	Hap1
CX376	NERICA-L-20	Indica II	Africa	ERS470662	Hap1
CX381	Adny_11	Indica II	None	ERS470667	Hap1
CX399	Matatag2	Indica II	Philippines	ERS470684	Hap1
CX75	At354	Indica II	Sri Lanka	ERS470728	Hap1
CX82	X21	Indica II	Vietnam	ERS470735	Hap1
CX84	X23	Indica II	Vietnam	ERS470737	Hap1
CX85	C71	Indica II	Vietnam	ERS470738	Hap1
CX89	M202	Indica II	United States	ERS470742	Hap1
IRIS_313-10167	IR_56	Indica II	Philippines	ERS468164	Hap1
IRIS_313-10287	UQUIHUA	Indica II	Peru	ERS468230	Hap1
IRIS_313-10397	IRGA_318-11-6-9-2B	Indica II	Colombia	ERS467924	Hap1
IRIS_313-11960	PORONG	Indica II	Indonesia	ERS469105	Hap1
IRIS_313-12234	ANLINGWUBAILI	Indica II	China	ERS469271	Hap1
IRIS_313-7773	SEBERANG_MR77	Indica II	Mali	ERS468575	Hap1
IRIS_313-7780	SONA(IET_1991)	Indica II	India	ERS468562	Hap1
IRIS_313-7807	WAS_170-B-B-1-1	Indica II	Senegal	ERS468569	Hap1
IRIS_313-7815	WAS_198-B-3-1-3	Indica II	Senegal	ERS468585	Hap1
IRIS_313-7824	WAS_21-B-B-20-4-3-3	Indica II	Senegal	ERS468583	Hap1
IRIS_313-7826	WAS_33-B-B-15-1-4-5	Indica II	Senegal	ERS468566	Hap1
IRIS_313-9966	CICA_9	Indica II	Colombia	ERS468133	Hap1
W040	INIAP_7	Indica II	Ecuador	SRR1239843	Hap1
W044	BKN_6987-68-14	Indica II	Thailand	SRR1239847	Hap1
W046	IR_9660-48-1-1-2	Indica II	Philippines	SRR1239849	Hap1
W051	RP2151-173-1-8	Indica II	India	SRR1239854	Hap1
W073	IR_2061-214-2-3	Indica II	Philippines	SRR1239876	Hap1
W086	4484	Indica II	China	SRR1239889	Hap1
W150	108S	Indica II	Unknown	SRR1239953	Hap1
W151	C418	Indica II	China	SRR1239954	Hap1
W152	CDR22	Indica II	China	SRR1239955	Hap1
W153	Chenghui448	Indica II	Sichuan	SRR1239956	Hap1
W154	Fengaizhan	Indica II	Guangdong	SRR1239957	Hap1
W159	R644	Indica II	China	SRR1239962	Hap1
W161	Y134	Indica II	China	SRR1239964	Hap1
W169	IR72	Indica II	Unknown	SRR1239972	Hap1
W170	PR106	Indica II	Pakistan	SRR1239973	Hap1
W172	Amo13_(Sana)	Indica II	Unknown	SRR1239975	Hap1
W174	Gayabyeo	Indica II	Korea	SRR1239977	Hap1
W176	Milyang23	Indica II	Korea	SRR1239979	Hap1
W177	MR185	Indica II	Malaysia	SRR1239980	Hap1
W179	Shwe_Thwe_Yin_Hyv	Indica II	Myanmar	SRR1239982	Hap1
W182	CR203	Indica II	Viet Nam	SRR1239985	Hap1
W184	PSB_RC_28	Indica II	Philippines	SRR1239987	Hap1
W185	PSB_RC_66	Indica II	Philippines	SRR1239988	Hap1
W188	IR66897B	Indica II	Unknown	SRR1239991	Hap1
W194	F6	Indica II	Japan	SRR1239997	Hap1
W197	Ai-Zi-DAO	Indica II	China	SRR1240000	Hap1
W211	Basmati370	Indica II	Philippines	SRR1240014	Hap1
W216	Type3	Indica II	India	SRR1240019	Hap1
W222	ir6	Indica II	Pakistan	SRR1240025	Hap1
W223	At354	Indica II	Sri Lanka	SRR1240026	Hap1
W228	OM1723	Indica II	Viet Nam	SRR1240031	Hap1
W229	X21	Indica II	Viet Nam	SRR1240032	Hap1
W230	X22	Indica II	Viet Nam	SRR1240033	Hap1
W231	X23	Indica II	Viet Nam	SRR1240034	Hap1
W241	Phalguna	Indica II	India	SRR1240044	Hap1
W289	IR_661-1-140-3-117	Indica II	Philippines	SRR1240092	Hap1
W291	IR_2071-625-1-252	Indica II	Philippines	SRR1240094	Hap1
W293	IR_8	Indica II	Philippines	SRR1240096	Hap1
W298	IR_36	Indica II	Philippines	SRR1240101	Hap1
W307	AGNO_(PSBRC28)	Indica II	Philippines	SRR1240110	Hap1
W309	NSICRC122	Indica II	Philippines	SRR1240112	Hap1
W311	PR_116	Indica II	Punjab	SRR1240114	Hap1
W313	OM_2517	Indica II	Viet Nam	SRR1240116	Hap1
W316	NEDA	Indica II	Islamic Republic of Iran	SRR1240119	Hap1
C107	Mowanggunei-2	Indica III	Yunnan	SRR1239707	Hap1
C142	Mowanggunei-1	Indica III	Yunnan	SRR1239742	Hap1
CX130	CHIPDA	Indica III	India	ERS470496	Hap1
IRIS_313-10544	DONGREM	Indica III	India	ERS469404	Hap1
IRIS_313-10575	KAYANGYA_D_402	Indica III	Myanmar	ERS469433	Hap1
IRIS_313-11010	PULUT_PUTIH	Indica III	Indonesia	ERS469806	Hap1
IRIS_313-11101	NONE	Indica III	Liberia	ERS469897	Hap1
IRIS_313-11288	ARC_18434	Indica III	India	ERS470077	Hap1
IRIS_313-11600	KOTODESHI	Indica III	India	ERS468787	Hap1
IRIS_313-11945	MALIKULI	Indica III	Bangladesh	ERS469090	Hap1
IRIS_313-12185	AE_NOUA	Indica III	Laos	ERS469249	Hap1
IRIS_313-12221	EA_LOUY	Indica III	Laos	ERS469261	Hap1
IRIS_313-12334	Do_khaw	Indica III	Laos	ERS469337	Hap1
IRIS_313-8450	498-2A_BR_8	Indica III	India	ERS467942	Hap1
IRIS_313-9020	LEUANG_CHAIYAPHUM	Indica III	Thailand	ERS468013	Hap1
IRIS_313-9067	BHOJON_KOLPO	Indica III	Bangladesh	ERS468018	Hap1
IRIS_313-9384	BARIK_KUDI	Indica III	India	ERS468064	Hap1
IRIS_313-9970	RACE_PERUMAL	Indica III	Sri Lanka	ERS468135	Hap1
W009	BERLIN	Indica III	Costa Rica	SRR1239812	Hap1
W023	Warrangal_Culture_1252	Indica III	India	SRR1239826	Hap1
W111	Sereno	Indica III	Jamaica	SRR1239914	Hap1
W112	ARC_10633	Indica III	India	SRR1239915	Hap1
W114	Heo_Trang	Indica III	Vietnam	SRR1239917	Hap1
W178	Manawthukha	Indica III	Philippines	SRR1239981	Hap1
W266	Yunjiang35	Indica III	Unknown	SRR1240069	Hap1
W321	Laozaogu	Indica III	Yunnan	SRR1240124	Hap1
C006	Shan-Huang_Zhan-2-1_	Indica Intermediate	China	SRR1239606	Hap1
C007	Shan-Huang_Zhan-2-2_	Indica Intermediate	India	SRR1239607	Hap1
C008	Swarna	Indica Intermediate	Guinea	SRR1239608	Hap1
C009	MOROBEREKAN	Indica Intermediate	United States	SRR1239609	Hap1
C025	Qingsiai16B	Indica Intermediate	Guangdong	SRR1239625	Hap1
C027	Dianrui409B	Indica Intermediate	Yunnan	SRR1239627	Hap1
C030	88B-1	Indica Intermediate	Jiangsu	SRR1239630	Hap1
C031	88B-2	Indica Intermediate	Hunan	SRR1239631	Hap1
C036	Shufeng101	Indica Intermediate	Sichuan	SRR1239636	Hap1
C038	Sankecui	Indica Intermediate	Hunan	SRR1239638	Hap1
C042	Guichao2hao	Indica Intermediate	Guangdong	SRR1239642	Hap1
C044	Teqingxuanhui	Indica Intermediate	Unknown	SRR1239644	Hap1
C045	Huangsiguizhan	Indica Intermediate	Guangdong	SRR1239645	Hap1
C046	Xiangwanxian3hao	Indica Intermediate	Hunan	SRR1239646	Hap1
C049	Jinyou1hao	Indica Intermediate	Fujian	SRR1239649	Hap1
C053	Momi	Indica Intermediate	Guangxi	SRR1239653	Hap1
C065	Hongwan1hao	Indica Intermediate	Fujian	SRR1239665	Hap1
C078	Qitoubaigu	Indica Intermediate	Yunnan	SRR1239678	Hap1
C090	Sanlicun	Indica Intermediate	Shanxi	SRR1239690	Hap1
C094	Menjiagao1	Indica Intermediate	Hainan	SRR1239694	Hap1
C096	Jinxibai-1	Indica Intermediate	Jiangxi	SRR1239696	Hap1
C097	Jinbaoyin	Indica Intermediate	Fujian	SRR1239697	Hap1
C098	Hongainuo	Indica Intermediate	Guangxi	SRR1239698	Hap1
C099	WH099	Indica Intermediate	Guangxi	SRR1239699	Hap1
C100	WH100	Indica Intermediate	Hubei	SRR1239700	Hap1
C102	Qiyuexian	Indica Intermediate	Guangxi	SRR1239702	Hap1
C105	WH105	Indica Intermediate	Yunnan	SRR1239705	Hap1
C113	Xiangzaoxian7hao	Indica Intermediate	Hunan	SRR1239713	Hap1
C114	80B	Indica Intermediate	Hunan	SRR1239714	Hap1
C117	Jiangnongzao1hao	Indica Intermediate	Jiangxi	SRR1239717	Hap1
C121	XiangaiB	Indica Intermediate	Jiangxi	SRR1239721	Hap1
C124	menjiading2	Indica Intermediate	Hainan	SRR1239724	Hap1
C129	Aihechi	Indica Intermediate	Jiangxi	SRR1239729	Hap1
C132	Jinzhinuo	Indica Intermediate	Yunnan	SRR1239732	Hap1
C160	Baoxie-7B	Indica Intermediate	Hunan	SRR1239760	Hap1
C162	Nanxiongzaoyou	Indica Intermediate	Guangdong	SRR1239762	Hap1
C166	Gui630	Indica Intermediate	Unknown	SRR1239766	Hap1
C167	76--1	Indica Intermediate	Unknown	SRR1239767	Hap1
C168	Xugunuo	Indica Intermediate	Hunan	SRR1239768	Hap1
C169	Taizhongzailai1	Indica Intermediate	Taiwan	SRR1239769	Hap1
C175	Zhengxian232	Indica Intermediate	Jiangsu	SRR1239775	Hap1
C176	Chenwan3hao	Indica Intermediate	Hunan	SRR1239776	Hap1
C192	Wukezhan	Indica Intermediate	Fujian	SRR1239792	Hap1
C194	Minbeiwanxian	Indica Intermediate	Fujian	SRR1239794	Hap1
C198	Zinuo	Indica Intermediate	Yunnan	SRR1239798	Hap1
C201	Yizhixiang	Indica Intermediate	Fujian	SRR1239801	Hap1
CX103	Rubio	Indica Intermediate	Peru	ERS470468	Hap1
CX115	Yun_hui_72	Indica Intermediate	China	ERS470480	Hap1
CX119	P59279	Indica Intermediate	None	ERS470484	Hap1
CX144	Hta7204	Indica Intermediate	None	ERS470508	Hap1
CX152	Cisadane	Indica Intermediate	None	ERS470517	Hap1
CX182	SLG1	Indica Intermediate	Japan	ERS470531	Hap1
CX221	Zhongyouzao_81	Indica Intermediate	China	ERS470548	Hap1
CX233	IR58821-23-1-3-1	Indica Intermediate	Philippines	ERS470557	Hap1
CX235	NSIC_RC9_(APO)	Indica Intermediate	Philippines	ERS470559	Hap1
CX265	MONOLAYA	Indica Intermediate	United States	ERS470577	Hap1
CX318	Heiheaihui_	Indica Intermediate	China	ERS470616	Hap1
CX319	Mengguandamagu	Indica Intermediate	China	ERS470617	Hap1
CX64	IRAT_352	Indica Intermediate	Philippines	ERS470717	Hap1
CX86	C70	Indica Intermediate	Vietnam	ERS470739	Hap1
CX87	Q5	Indica Intermediate	Vietnam	ERS470740	Hap1
IRIS_313-10030	NS252	Indica Intermediate	Madagascar	ERS467872	Hap1
IRIS_313-10226	TONG_GU_HONG	Indica Intermediate	China	ERS468177	Hap1
IRIS_313-10234	PSBRC50	Indica Intermediate	Philippines	ERS468178	Hap1
IRIS_313-10235	PSBRC68	Indica Intermediate	Philippines	ERS468179	Hap1
IRIS_313-10394	IR_80310-12-B-1-3-B	Indica Intermediate	Philippines	ERS468202	Hap1
IRIS_313-10404	K_479-2-3	Indica Intermediate	India	ERS467927	Hap1
IRIS_313-10412	RR_272-17-829	Indica Intermediate	Indonesia	ERS467928	Hap1
IRIS_313-10423	YN_1353-3	Indica Intermediate	Myanmar	ERS467832	Hap1
IRIS_313-10833	EDAKKADAN_0-69-27	Indica Intermediate	India	ERS469636	Hap1
IRIS_313-10835	PERUNEL_0-69-18	Indica Intermediate	India	ERS469638	Hap1
IRIS_313-11041	POONGAR	Indica Intermediate	India	ERS469840	Hap1
IRIS_313-11255	ARC_7056	Indica Intermediate	India	ERS470050	Hap1
IRIS_313-11295	ARC_11397	Indica Intermediate	India	ERS470085	Hap1
IRIS_313-11296	ARC_12800	Indica Intermediate	India	ERS470086	Hap1
IRIS_313-11433	MR136-1	Indica Intermediate	India	ERS468650	Hap1
IRIS_313-11570	GENG_77-4	Indica Intermediate	China	ERS468764	Hap1
IRIS_313-11577	LANG_QIAN_CHE	Indica Intermediate	China	ERS468771	Hap1
IRIS_313-11663	MARHARORA	Indica Intermediate	Zimbabwe	ERS468839	Hap1
IRIS_313-11729	MEI_LIU_ZAO_5	Indica Intermediate	China	ERS468892	Hap1
IRIS_313-11731	QING_TAI_AI	Indica Intermediate	China	ERS468894	Hap1
IRIS_313-11772	ROJON'NY_NTAOLO	Indica Intermediate	Madagascar	ERS468933	Hap1
IRIS_313-12329	CHAO_DO	Indica Intermediate	Laos	ERS469333	Hap1
IRIS_313-7641	B_6144-MR-6-0-0	Indica Intermediate	Indonesia	ERS468589	Hap1
IRIS_313-7797	UPL_RI-7	Indica Intermediate	Philippines	ERS468590	Hap1
IRIS_313-9023	CR60-10	Indica Intermediate	India	ERS468014	Hap1
IRIS_313-9503	BINUHANGIN	Indica Intermediate	Philippines	ERS468076	Hap1
W029	Ai_Chueh_Ta_Pai_Ku	Indica Intermediate	Taiwan	SRR1239832	Hap1
W030	Thang_10	Indica Intermediate	Vietnam	SRR1239833	Hap1
W035	K8C-263-3	Indica Intermediate	Suriname	SRR1239838	Hap1
W042	Red	Indica Intermediate	Pakistan	SRR1239845	Hap1
W054	Toga	Indica Intermediate	India	SRR1239857	Hap1
W070	Shui_Ya_Jien	Indica Intermediate	Hong Kong	SRR1239873	Hap1
W071	AKP_4	Indica Intermediate	India	SRR1239874	Hap1
W074	TAINUNG_45	Indica Intermediate	Taiwan	SRR1239877	Hap1
W075	Sapundali_Local	Indica Intermediate	India	SRR1239878	Hap1
W084	IR_58614-B-B-8-2	Indica Intermediate	Philippines	SRR1239887	Hap1
W085	KECHENGNUO_NO._4	Indica Intermediate	China	SRR1239888	Hap1
W101	AMANE	Indica Intermediate	Sri Lanka	SRR1239904	Hap1
W133	TD_70	Indica Intermediate	Thailand	SRR1239936	Hap1
W135	Shimla_Early	Indica Intermediate	Iraq	SRR1239938	Hap1
W145	GUYANE_1	Indica Intermediate	Chad	SRR1239948	Hap1
W147	BR11	Indica Intermediate	Bangladesh	SRR1239950	Hap1
W148	BR24	Indica Intermediate	India	SRR1239951	Hap1
W149	93072	Indica Intermediate	China	SRR1239952	Hap1
W155	Gang46B	Indica Intermediate	China	SRR1239958	Hap1
W157	Huajingxian74	Indica Intermediate	Guangdong	SRR1239960	Hap1
W163	Yuexiangzhan	Indica Intermediate	Guangdong	SRR1239966	Hap1
W164	Zaoxian14	Indica Intermediate	Unknown	SRR1239967	Hap1
W165	Zhong413	Indica Intermediate	Zhejiang	SRR1239968	Hap1
W166	Zhongyouzao81	Indica Intermediate	Zhejiang	SRR1239969	Hap1
W167	Zihui100	Indica Intermediate	Anhui	SRR1239970	Hap1
W171	TKM9	Indica Intermediate	Philippines	SRR1239974	Hap1
W186	TEQING	Indica Intermediate	Philippines	SRR1239989	Hap1
W187	IR68552-55-3-2	Indica Intermediate	Philippines	SRR1239990	Hap1
W198	Babaomi	Indica Intermediate	China	SRR1240001	Hap1
W199	Diantun502	Indica Intermediate	yunnan	SRR1240002	Hap1
W200	Heiheaihui	Indica Intermediate	Unknown	SRR1240003	Hap1
W201	Jiangxisimiao	Indica Intermediate	Jiangxi	SRR1240004	Hap1
W202	Laohudao	Indica Intermediate	Zhejiang	SRR1240005	Hap1
W203	Linjintangdao	Indica Intermediate	Unknown	SRR1240006	Hap1
W206	Wumanggaonuo	Indica Intermediate	Unknown	SRR1240009	Hap1
W212	Bhavani	Indica Intermediate	India	SRR1240015	Hap1
W217	IRAT352	Indica Intermediate	Indonesia	SRR1240020	Hap1
W218	TB154E-TB-2	Indica Intermediate	Unknown	SRR1240021	Hap1
W221	MR77_(seberang)	Indica Intermediate	Philippines	SRR1240024	Hap1
W227	OM1706	Indica Intermediate	Viet Nam	SRR1240030	Hap1
W233	C70	Indica Intermediate	Viet Nam	SRR1240036	Hap1
W234	Q5	Indica Intermediate	Viet Nam	SRR1240037	Hap1
W239	ASD18	Indica Intermediate	India	SRR1240042	Hap1
W240	TGMS29	Indica Intermediate	India	SRR1240043	Hap1
W242	Ajaya	Indica Intermediate	India	SRR1240045	Hap1
W246	RUSTYLATE/Zhong_413	Indica Intermediate	Unknown	SRR1240049	Hap1
W264	CHOROFA	Indica Intermediate	Philippines	SRR1240067	Hap1
W267	Yunhui72	Indica Intermediate	China	SRR1240070	Hap1
W268	Wudadaozhong	Indica Intermediate	South Korea	SRR1240071	Hap1
W269	IR65600-27-1-2-2	Indica Intermediate	Philippines	SRR1240072	Hap1
W270	Yetuozai	Indica Intermediate	Unknown	SRR1240073	Hap1
W271	P59279	Indica Intermediate	Unknown	SRR1240074	Hap1
W272	Tsao_wan_ching	Indica Intermediate	China	SRR1240075	Hap1
W282	Ma_ba_you_zhan	Indica Intermediate	China	SRR1240085	Hap1
W299	JAYA	Indica Intermediate	India	SRR1240102	Hap1
W320	Wenxiangnuo	Indica Intermediate	Yunnan	SRR1240123	Hap1
W322	Lengshuinuo	Indica Intermediate	Yunnan	SRR1240125	Hap1
CX395	YSBR1	Intermediate	China	ERS470681	Hap1
CX402	Tog6542	Intermediate	Africa	ERS470688	Hap1
IRIS_313-7646	BETSILAIZINA	Intermediate	Madagascar	ERS468592	Hap1
IRIS_313-8067	MEDUSA	Intermediate	Italy	ERS468467	Hap1
W055	Ragasu	Intermediate	Taiwan	SRR1239858	Hap1
W097	Santhi_990	Intermediate	Pakistan	SRR1239900	Hap1
W125	Yong_Chal_Byo	Intermediate	South Korea	SRR1239928	Hap1
W158	M3122	Intermediate	China	SRR1239961	Hap1
W175	Iksan438	Intermediate	Korea	SRR1239978	Hap1
W191	Pusa_(Basmatil)	Intermediate	China	SRR1239994	Hap1
W192	ASD16	Intermediate	India	SRR1239995	Hap1
W196	NAN-29-2	Intermediate	Unknown	SRR1239999	Hap1
W261	Ginga	Intermediate	Japan	SRR1240064	Hap1
W294	LABELLE	Intermediate	United States	SRR1240097	Hap1
W328	Sibeitichao6	Intermediate	Beijing	SRR1240131	Hap1
C057	Dandongludao	Japonica Intermediate	Liaoning; China	SRR1239657	Hap1
IRIS_313-10453	LU_TAO_2	Japonica Intermediate	China	ERS469365	Hap1
C074	cunsanli	Temperate Japonica	Jiangsu	SRR1239674	Hap1
CX282	Lijiangxintuanheigu	Temperate Japonica	China	ERS470593	Hap1
W302	KUNTLAN	Tropical Japonica	Indonesia	SRR1240105	Hap1
IRIS_313-10531	HR22	VI/Aromatic	India	ERS469395	Hap1
IRIS_313-10735	LAL_SAR	Aus	Nepal	ERS469542	Hap2
IRIS_313-10871	ARC_11777	Aus	India	ERS469675	Hap2
IRIS_313-11602	MALCHI	Aus	India	ERS468789	Hap2
IRIS_313-9137	ARC_10100	Aus	India	ERS467782	Hap2
W048	N-2703	Aus	Nepal	SRR1239851	Hap2
W091	Gallawa	Aus	Sri Lanka	SRR1239894	Hap2
W092	Karayal	Aus	Sri Lanka	SRR1239895	Hap2
W099	SL_22-620	Aus	Sierra Leone	SRR1239902	Hap2
W105	HKG_98	Aus	Mali	SRR1239908	Hap2
W140	Ittikulama	Aus	Sri Lanka	SRR1239943	Hap2
CX316	MR39	Intermediate	China	ERS470614	Hap2
IRIS_313-11754	AMBOHIMANDAY	Intermediate	Madagascar	ERS468917	Hap2
IRIS_313-7722	LATSIBOZAKA_112-1	Intermediate	Madagascar	ERS468626	Hap2
IRIS_313-8184	FRAGRANCE	Intermediate	Italy	ERS468528	Hap2
IRIS_313-8324	POENOET_HITAM	Intermediate	Indonesia	ERS467801	Hap2
W079	A_152	Intermediate	Bangladesh	SRR1239882	Hap2
W128	TAINO_38	Intermediate	Taiwan	SRR1239931	Hap2
W304	CPSLO_17	Intermediate	United States	SRR1240107	Hap2
C002	Dom_Sufid	VI/Aromatic	Philippines	SRR1239602	Hap2
CX65	Domsiah	VI/Aromatic	Iran	ERS470718	Hap2
CX66	Tarom__molaii	VI/Aromatic	Iran	ERS470719	Hap2
CX67	Binam	VI/Aromatic	Iran	ERS470720	Hap2
IRIS_313-11258	ARC_13502	VI/Aromatic	India	ERS470053	Hap2
IRIS_313-9601	CHAWAL	VI/Aromatic	Pakistan	ERS467816	Hap2
W014	Red_Khosha_Cerma	VI/Aromatic	Afghanistan	SRR1239817	Hap2
W050	Ak_Tokhum	VI/Aromatic	Azerbaijan	SRR1239853	Hap2
W077	79	VI/Aromatic	Guyana	SRR1239880	Hap2
W081	Gasym_Hany	VI/Aromatic	Azerbaijan	SRR1239884	Hap2
W129	2	VI/Aromatic	Afghanistan	SRR1239932	Hap2
W136	LA_PLATA_GENA_F.A.	VI/Aromatic	Argentina	SRR1239939	Hap2
W219	Domsiah	VI/Aromatic	Netherlands	SRR1240022	Hap2
W220	Tarommolai1	VI/Aromatic	Unknown	SRR1240023	Hap2
W252	SADRI_RICE_1	VI/Aromatic	Iran	SRR1240055	Hap2
W255	ZIRI	VI/Aromatic	India	SRR1240058	Hap2
W256	Dacca6	VI/Aromatic	United States	SRR1240059	Hap2
W258	Amareles	VI/Aromatic	Portugal	SRR1240061	Hap2
W306	BASMATI_385	VI/Aromatic	Pakistan	SRR1240109	Hap2
C191	Younian	Indica I	Guizhou	SRR1239791	Hap2
IRIS_313-10190	DENG_DENG_QI	Indica I	China	ERS468172	Hap2
IRIS_313-11855	DA_GUAN_YIN_ZHAN	Indica I	China	ERS469008	Hap2
W146	10340	Indica I	Italy	SRR1239949	Hap2
C061	Yangdao2hao	Indica II	Jiangsu	SRR1239661	Hap2
CX100	Palung_2	Indica II	Nepal	ERS470465	Hap2
CX230	IR64-IL	Indica II	China	ERS470554	Hap2
CX375	NERICA-L-1	Indica II	Africa	ERS470661	Hap2
CX377	NERICA-L-27	Indica II	Africa	ERS470663	Hap2
CX382	Kogomg_1-1	Indica II	None	ERS470668	Hap2
CX403	IR64a	Indica II	Philippines	ERS470689	Hap2
CX76	BG304	Indica II	Sri Lanka	ERS470729	Hap2
CX90	Chhomromg	Indica II	Nepal	ERS470744	Hap2
IRIS_313-10289	ARAURE_1	Indica II	Venezuela	ERS467914	Hap2
IRIS_313-11784	MBEIMBEIHUN	Indica II	Sierra Leone	ERS468940	Hap2
IRIS_313-7808	WAS_173-B-B-6-2-2	Indica II	Senegal	ERS468552	Hap2
IRIS_313-7832	WAS_63-22-5-9-10-1	Indica II	Senegal	ERS468550	Hap2
W168	Bg90-2	Indica II	Brazil	SRR1239971	Hap2
W183	OM997	Indica II	VietNam	SRR1239986	Hap2
W189	IR58025B	Indica II	Unknown	SRR1239992	Hap2
W190	Dhan4	Indica II	India	SRR1239993	Hap2
W224	BG304	Indica II	Sri Lanka	SRR1240027	Hap2
W236	Pokhreli	Indica II	Philippines	SRR1240039	Hap2
W237	Govnd	Indica II	Unknown	SRR1240040	Hap2
W238	UPR191-66	Indica II	India	SRR1240041	Hap2
W243	Dodda	Indica II	Unknown	SRR1240046	Hap2
W244	Palung_2	Indica II	Philippines	SRR1240047	Hap2
W259	Up15	Indica II	Japan	SRR1240062	Hap2
W295	LEBONNET	Indica II	United States	SRR1240098	Hap2
W301	IR_64	Indica II	Philippines	SRR1240104	Hap2
W308	PSBRC82	Indica II	Philippines	SRR1240111	Hap2
W312	CIGEULIS	Indica II	Indonesia	SRR1240115	Hap2
W314	BRRI_DHAN_28	Indica II	Bangladesh	SRR1240117	Hap2
W315	CIBOGO	Indica II	Indonesia	SRR1240118	Hap2
W317	CIHERANG	Indica II	Indonesia	SRR1240120	Hap2
IRIS_313-11129	HAORU	Indica III	Myanmar	ERS469928	Hap2
W089	Egyptian_Wild_Type	Indica III	Turkey	SRR1239892	Hap2
W276	Pathma_wee	Indica III	Sri Lanka	SRR1240079	Hap2
CX219	FL478	Indica Intermediate	Philippines	ERS470545	Hap2
CX240	Carijo	Indica Intermediate	Brazil	ERS470564	Hap2
CX349	KCD1	Indica Intermediate	None	ERS470633	Hap2
IRIS_313-10026	KITRANA_1007	Indica Intermediate	Madagascar	ERS468144	Hap2
IRIS_313-10113	EX_FOILAEIN(NAPUTO)	Indica Intermediate	Mozambique	ERS468155	Hap2
IRIS_313-7650	BOTOHAVANA_139	Indica Intermediate	Madagascar	ERS468584	Hap2
IRIS_313-7654	BOUAKE_189	Indica Intermediate	Ivory Coast	ERS468579	Hap2
IRIS_313-7809	WAS_174-B-3-5	Indica Intermediate	Senegal	ERS468643	Hap2
IRIS_313-9388	VARY_MALADY_MENA	Indica Intermediate	Madagascar	ERS467841	Hap2
IRIS_313-9740	ROJOFOTSY	Indica Intermediate	Madagascar	ERS468228	Hap2
W037	Manga_Kely_694	Indica Intermediate	Madagascar	SRR1239840	Hap2
W043	Dichroa_Alef_Uslkij	Indica Intermediate	Kazakhstan	SRR1239846	Hap2
W066	IR_238	Indica Intermediate	Philippines	SRR1239869	Hap2
W078	B805D-MR-16-8-3	Indica Intermediate	Indonesia	SRR1239881	Hap2
W083	CNTLR80076-44-1-1-1	Indica Intermediate	Thailand	SRR1239886	Hap2
W137	CM1;_HAIPONG	Indica Intermediate	Vietnam	SRR1239940	Hap2
W180	Bg300	Indica Intermediate	Sri Lanka	SRR1239983	Hap2
W181	Bg94-1	Indica Intermediate	Sri Lanka	SRR1239984	Hap2
W213	IR50	Indica Intermediate	India	SRR1240016	Hap2
W245	TKM6	Indica Intermediate	India	SRR1240048	Hap2
W263	SADAJIRA-19-303	Indica Intermediate	Unknown	SRR1240066	Hap2
W265	La110	Indica Intermediate	United States	SRR1240068	Hap2
W310	BRRI_DHAN_29	Indica Intermediate	Bangladesh	SRR1240113	Hap2
C003	Gerdeh	Japonica Intermediate	Iran	SRR1239603	Hap2
C084	Haobuka	Japonica Intermediate	Yunnan	SRR1239684	Hap2
C085	Shanjiugu	Japonica Intermediate	Sichuan	SRR1239685	Hap2
C185	Haomake(K)	Japonica Intermediate	Yunnan	SRR1239785	Hap2
C186	Sanbangqishiluo	Japonica Intermediate	Yunnan	SRR1239786	Hap2
CX142	Ai_Yeh_Lu	Japonica Intermediate	China	ERS470506	Hap2
CX353	CAU1	Japonica Intermediate	China	ERS470638	Hap2
IRIS_313-10061	ESTRELA_A	Japonica Intermediate	Portugal	ERS468413	Hap2
IRIS_313-10119	GITANO	Japonica Intermediate	Italy	ERS468363	Hap2
IRIS_313-10258	BULI_INIA	Japonica Intermediate	Chile	ERS467900	Hap2
IRIS_313-10834	IARI_11387	Japonica Intermediate	India	ERS469637	Hap2
IRIS_313-11923	KHAO'_NGAW	Japonica Intermediate	Thailand	ERS469067	Hap2
IRIS_313-12077	YOI	Japonica Intermediate	Laos	ERS469220	Hap2
IRIS_313-12258	Don	Japonica Intermediate	Laos	ERS469285	Hap2
IRIS_313-12265	Kon_Sim	Japonica Intermediate	Laos	ERS469335	Hap2
IRIS_313-12340	Nyao	Japonica Intermediate	Laos	ERS469340	Hap2
IRIS_313-12342	Hai_na	Japonica Intermediate	Laos	ERS469343	Hap2
IRIS_313-12352	MEE	Japonica Intermediate	Laos	ERS469352	Hap2
IRIS_313-8027	ANSEATICO	Japonica Intermediate	Italy	ERS468533	Hap2
IRIS_313-8065	SAMBA	Japonica Intermediate	Italy	ERS468478	Hap2
IRIS_313-8114	FAISCA	Japonica Intermediate	Portugal	ERS468464	Hap2
IRIS_313-8139	SANDOCA	Japonica Intermediate	Portugal	ERS468536	Hap2
IRIS_313-8145	SUPER	Japonica Intermediate	Portugal	ERS468476	Hap2
IRIS_313-8158	CT_23	Japonica Intermediate	Colombia	ERS468637	Hap2
IRIS_313-8159	CT_36	Japonica Intermediate	Colombia	ERS468638	Hap2
IRIS_313-8167	DELTA	Japonica Intermediate	France	ERS468640	Hap2
IRIS_313-8177	AUGUSTO	Japonica Intermediate	Italy	ERS468529	Hap2
IRIS_313-8205	SALVO	Japonica Intermediate	Italy	ERS468460	Hap2
IRIS_313-9193	EAN_4_C_1	Japonica Intermediate	Brazil	ERS468323	Hap2
W010	Sel._No._388	Japonica Intermediate	Uruguay	SRR1239813	Hap2
W019	H57-3-1	Japonica Intermediate	Argentina	SRR1239822	Hap2
W021	Khao_Luang	Japonica Intermediate	Laos	SRR1239824	Hap2
W047	Jumli_dhan	Japonica Intermediate	Nepal	SRR1239850	Hap2
W061	Ardito	Japonica Intermediate	Italy	SRR1239864	Hap2
W063	Vary_Tarva_Osla	Japonica Intermediate	Portugal	SRR1239866	Hap2
W122	BHIM_DHAN	Japonica Intermediate	Nepal	SRR1239925	Hap2
W127	Buphopa	Japonica Intermediate	Myanmar	SRR1239930	Hap2
W143	Jyanak	Japonica Intermediate	Bhutan	SRR1239946	Hap2
W323	Feienuo2	Japonica Intermediate	Guizhou	SRR1240126	Hap2
W324	Zimangfeie	Japonica Intermediate	Guizhou	SRR1240127	Hap2
W326	Haolvguangnian	Japonica Intermediate	Guizhou	SRR1240129	Hap2
C004	Li-Jiang-Xin-Tuan-Hei-Gu_	Temperate Japonica	China	SRR1239604	Hap2
C017	AnnongwangengB-1	Temperate Japonica	Anhui	SRR1239617	Hap2
C032	Longhuamaohu	Temperate Japonica	Hebei	SRR1239632	Hap2
C034	Zhonglouyihao1	Temperate Japonica	Shanxi	SRR1239634	Hap2
C056	Jindao1hao	Temperate Japonica	Shanxi	SRR1239656	Hap2
C082	Gaoyangdiandao	Temperate Japonica	Hebei	SRR1239682	Hap2
C083	chikenuo	Temperate Japonica	Fujian	SRR1239683	Hap2
C103	Yuyannuo-1	Temperate Japonica	Yunnan	SRR1239703	Hap2
C137	Cungunuo	Temperate Japonica	Guizhou	SRR1239737	Hap2
C138	Lengshuigu	Temperate Japonica	Yunnan	SRR1239738	Hap2
C171	Xingguo	Temperate Japonica	Jilin	SRR1239771	Hap2
C179	Haobayong1	Temperate Japonica	Yunnan	SRR1239779	Hap2
C181	Feidongtangdao	Temperate Japonica	Anhui	SRR1239781	Hap2
C196	Yuyannuo-2	Temperate Japonica	Yunnan	SRR1239796	Hap2
CX317	MR19	Temperate Japonica	China	ERS470615	Hap2
CX354	CAU2	Temperate Japonica	China	ERS470639	Hap2
CX49	NAN-29-2	Temperate Japonica	China	ERS470698	Hap2
IRIS_313-10967	IAS22-8_PALMAR	Temperate Japonica	Brazil	ERS469769	Hap2
IRIS_313-12059	LIGEN_2	Temperate Japonica	China	ERS469192	Hap2
IRIS_313-12060	LIJIAN_942	Temperate Japonica	China	ERS469193	Hap2
IRIS_313-8109	CAMPINO	Temperate Japonica	Portugal	ERS468471	Hap2
IRIS_313-8113	ESCARLATE	Temperate Japonica	Portugal	ERS468466	Hap2
IRIS_313-8136	SAFARI	Temperate Japonica	Portugal	ERS468492	Hap2
IRIS_313-8137	SAGRES	Temperate Japonica	Portugal	ERS468557	Hap2
IRIS_313-8149	TOPAZIO	Temperate Japonica	Portugal	ERS468499	Hap2
IRIS_313-8160	CT_58	Temperate Japonica	Colombia	ERS468639	Hap2
IRIS_313-8218	SAKHA_103	Temperate Japonica	Egypt	ERS468689	Hap2
W016	NORIN_11	Temperate Japonica	Japan	SRR1239819	Hap2
W018	UZ_ROSZ_M38	Temperate Japonica	Uzbekistan	SRR1239821	Hap2
W027	Chacareiro_Uruguay	Temperate Japonica	Uruguay	SRR1239830	Hap2
W064	CSORNUJ	Temperate Japonica	Hungary	SRR1239867	Hap2
W088	CHUNJIANGZAO_NO._1	Temperate Japonica	China	SRR1239891	Hap2
W109	WIR_911	Temperate Japonica	Russian Federation	SRR1239912	Hap2
W120	Bombilla	Temperate Japonica	Spain	SRR1239923	Hap2
W130	LUSITANO	Temperate Japonica	Portugal	SRR1239933	Hap2
W249	Teksichut	Temperate Japonica	Philippines	SRR1240052	Hap2
W250	Eiko	Temperate Japonica	Japan	SRR1240053	Hap2
W283	Daegujo	Temperate Japonica	Republic of Korea	SRR1240086	Hap2
W327	JinghuB	Temperate Japonica	Anhui	SRR1240130	Hap2
C005	AZUCENA	Tropical Japonica	Philippines	SRR1239605	Hap2
C010	CYPRESS	Tropical Japonica	Philippines	SRR1239610	Hap2
C123	Taidongludao	Tropical Japonica	Taiwan	SRR1239723	Hap2
C153	IRAT109	Tropical Japonica	Unknown	SRR1239753	Hap2
CX113	Biniapan	Tropical Japonica	None	ERS470478	Hap2
CX129	MOLOK	Tropical Japonica	Indonesia	ERS470494	Hap2
CX132	AP423	Tropical Japonica	India	ERS470498	Hap2
CX220	IRAT109	Tropical Japonica	Brazil	ERS470547	Hap2
CX262	IAC3	Tropical Japonica	China	ERS470575	Hap2
CX280	Maravilha	Tropical Japonica	Brazil	ERS470591	Hap2
CX355	Yunlu_102	Tropical Japonica	China	ERS470640	Hap2
CX359	Yunlu_103	Tropical Japonica	China	ERS470644	Hap2
CX367	Haogelao	Tropical Japonica	China	ERS470652	Hap2
CX371	NERICA_1	Tropical Japonica	Africa	ERS470657	Hap2
CX374	NERICA_9	Tropical Japonica	Africa	ERS470660	Hap2
CX77	Lemont	Tropical Japonica	United States	ERS470730	Hap2
IRIS_313-10051	TSIVIMBININA	Tropical Japonica	Madagascar	ERS467905	Hap2
IRIS_313-10075	SANGOKU	Tropical Japonica	Japan	ERS468420	Hap2
IRIS_313-10076	SHINA_MOCHI	Tropical Japonica	Japan	ERS468421	Hap2
IRIS_313-10272	COLOMBIA_1	Tropical Japonica	Colombia	ERS467805	Hap2
IRIS_313-10644	BUSIYETAN	Tropical Japonica	Philippines	ERS469466	Hap2
IRIS_313-10645	LENKIBE-N	Tropical Japonica	Philippines	ERS469467	Hap2
IRIS_313-10708	B_6311_A_5553-16-2	Tropical Japonica	United States	ERS469533	Hap2
IRIS_313-10722	GODAWEL	Tropical Japonica	Sri Lanka	ERS469528	Hap2
IRIS_313-10743	SERAJU	Tropical Japonica	Indonesia	ERS469551	Hap2
IRIS_313-10752	NONE	Tropical Japonica	United States	ERS469561	Hap2
IRIS_313-10794	MENDUNGAN	Tropical Japonica	Indonesia	ERS469603	Hap2
IRIS_313-10796	MOLOG	Tropical Japonica	Indonesia	ERS469605	Hap2
IRIS_313-10827	BINARITOS	Tropical Japonica	Philippines	ERS469629	Hap2
IRIS_313-10888	ARC_12726	Tropical Japonica	India	ERS469693	Hap2
IRIS_313-10893	ARC_13156	Tropical Japonica	India	ERS469699	Hap2
IRIS_313-10919	PINIDWA_QAN_QIPUGO_PINGKITAN	Tropical Japonica	Philippines	ERS469717	Hap2
IRIS_313-10920	PINIDWA_QAN_QIPUGO_QELEK	Tropical Japonica	Philippines	ERS469718	Hap2
IRIS_313-10953	PADI_ABUNG_KUNING	Tropical Japonica	Indonesia	ERS469754	Hap2
IRIS_313-10991	GINATOS	Tropical Japonica	Philippines	ERS469834	Hap2
IRIS_313-10999	LANDEO	Tropical Japonica	Indonesia	ERS469795	Hap2
IRIS_313-11328	PADI_BURIH	Tropical Japonica	Malaysia	ERS470121	Hap2
IRIS_313-11380	CA-ONG(WHITE)	Tropical Japonica	Philippines	ERS470172	Hap2
IRIS_313-11426	CHATAO	Tropical Japonica	Brazil	ERS470217	Hap2
IRIS_313-11427	GEM_OU_BRAZIL	Tropical Japonica	Brazil	ERS470218	Hap2
IRIS_313-11428	MARANHAO_BRANCO	Tropical Japonica	Brazil	ERS468717	Hap2
IRIS_313-11435	MONMINEUPLEU	Tropical Japonica	Ivory Coast	ERS468652	Hap2
IRIS_313-11464	CARAWI	Tropical Japonica	Philippines	ERS468679	Hap2
IRIS_313-11465	DINORADO	Tropical Japonica	Philippines	ERS468680	Hap2
IRIS_313-11495	ANENOE	Tropical Japonica	Indonesia	ERS468706	Hap2
IRIS_313-11673	BURI-BURING	Tropical Japonica	Philippines	ERS468849	Hap2
IRIS_313-11736	MALAGKIT(PINELIPE)	Tropical Japonica	Philippines	ERS468899	Hap2
IRIS_313-11929	GILINGAN_MARANGRAS	Tropical Japonica	Philippines	ERS469074	Hap2
IRIS_313-12031	P.T.Q._QINDONAAL	Tropical Japonica	Philippines	ERS469165	Hap2
IRIS_313-12069	PULUT_MAS	Tropical Japonica	Indonesia	ERS469201	Hap2
IRIS_313-12129	Mon_Lai	Tropical Japonica	Laos	ERS469223	Hap2
IRIS_313-12321	NONE	Tropical Japonica	Laos	ERS469328	Hap2
IRIS_313-7838	62667	Tropical Japonica	Senegal	ERS468599	Hap2
IRIS_313-7868	CT13582-15-5-M	Tropical Japonica	Colombia	ERS468622	Hap2
IRIS_313-8061	75_UPLA	Tropical Japonica	Argentina	ERS468627	Hap2
IRIS_313-8072	CENTURY_PATNA	Tropical Japonica	United States	ERS468524	Hap2
IRIS_313-8102	BLUE_BONNET	Tropical Japonica	United States	ERS468537	Hap2
IRIS_313-8173	A_201	Tropical Japonica	United States	ERS468510	Hap2
IRIS_313-8180	DELLMONT	Tropical Japonica	United States	ERS468521	Hap2
IRIS_313-8202	REXMONT	Tropical Japonica	United States	ERS468545	Hap2
IRIS_313-8209	ALEXANDROS	Tropical Japonica	Greece	ERS468463	Hap2
IRIS_313-8431	BOCAO	Tropical Japonica	Philippines	ERS468454	Hap2
IRIS_313-8523	OS4	Tropical Japonica	Nigeria	ERS467890	Hap2
IRIS_313-8572	ONOY	Tropical Japonica	Philippines	ERS468438	Hap2
IRIS_313-8694	TRES_MESES	Tropical Japonica	Brazil	ERS468443	Hap2
IRIS_313-8768	MOROFIN	Tropical Japonica	Ivory Coast	ERS468381	Hap2
IRIS_313-8876	DELITUS	Tropical Japonica	France	ERS468385	Hap2
IRIS_313-9050	ANGKARONG	Tropical Japonica	Malaysia	ERS468448	Hap2
IRIS_313-9389	KINANDANG_BUSIKSIK	Tropical Japonica	Philippines	ERS468397	Hap2
IRIS_313-9405	INGSA_BELANAK	Tropical Japonica	Indonesia	ERS468398	Hap2
IRIS_313-9491	BLUE_BELLE	Tropical Japonica	United States	ERS468401	Hap2
IRIS_313-9550	VEGOLD	Tropical Japonica	United States	ERS468404	Hap2
IRIS_313-9745	VARY_MALADY	Tropical Japonica	Madagascar	ERS468406	Hap2
IRIS_313-9789	RIKUTO_TAUKI_MOCHI_27	Tropical Japonica	Japan	ERS468407	Hap2
IRIS_313-9800	KAHEI	Tropical Japonica	Japan	ERS468408	Hap2
IRIS_313-9897	BIKYAT	Tropical Japonica	Philippines	ERS468410	Hap2
W002	E_B_Gopher	Tropical Japonica	United States	SRR1239805	Hap2
W003	C_5560	Tropical Japonica	Thailand	SRR1239806	Hap2
W004	Quinimpol	Tropical Japonica	Philippines	SRR1239807	Hap2
W005	TAICHU_MOCHI_59	Tropical Japonica	Taiwan	SRR1239808	Hap2
W006	WC_2811	Tropical Japonica	Micronesia	SRR1239809	Hap2
W007	Criollo_Chivacoa_2	Tropical Japonica	Venezuela	SRR1239810	Hap2
W008	Secano_do_Brazil	Tropical Japonica	El Salvador	SRR1239811	Hap2
W017	R_75	Tropical Japonica	Senegal	SRR1239820	Hap2
W022	C_8429	Tropical Japonica	Papua New Guinea	SRR1239825	Hap2
W024	Padi_Pohon_Batu	Tropical Japonica	Malaysia	SRR1239827	Hap2
W041	Onu_B	Tropical Japonica	Zaire	SRR1239844	Hap2
W053	GPNO_1106	Tropical Japonica	Guatemala	SRR1239856	Hap2
W057	Grassy	Tropical Japonica	Haiti	SRR1239860	Hap2
W062	NANTON_NO._131	Tropical Japonica	Taiwan	SRR1239865	Hap2
W065	R_67	Tropical Japonica	Senegal	SRR1239868	Hap2
W067	Mitak	Tropical Japonica	Indonesia	SRR1239870	Hap2
W102	Padi_Tarab_Arab	Tropical Japonica	Malaysia	SRR1239905	Hap2
W110	Lua_Chua_Chan	Tropical Japonica	Vietnam	SRR1239913	Hap2
W113	Simpor	Tropical Japonica	Brunei	SRR1239916	Hap2
W116	WC_10253	Tropical Japonica	Unknown	SRR1239919	Hap2
W118	EMBRAPA_1200	Tropical Japonica	Brazil	SRR1239921	Hap2
W119	WAB462-10-3-1	Tropical Japonica	Cote D'Ivoire	SRR1239922	Hap2
W123	WC_3532	Tropical Japonica	Peru	SRR1239926	Hap2
W173	Khazar	Tropical Japonica	Iran	SRR1239976	Hap2
W225	Lemont	Tropical Japonica	Philippines	SRR1240028	Hap2
W251	RUBIO	Tropical Japonica	Philippines	SRR1240054	Hap2
W253	Sereendan_Kuning	Tropical Japonica	Malaysia	SRR1240056	Hap2
W254	SAI-BUI-BAO	Tropical Japonica	Viet Nam	SRR1240057	Hap2
W257	Latisai1	Tropical Japonica	Unknown	SRR1240060	Hap2
W260	Uz-Rosz_275	Tropical Japonica	Philippines	SRR1240063	Hap2
W273	Anambae_ndanggalasi	Tropical Japonica	Indonesia	SRR1240076	Hap2
W275	Heen_goda_wee	Tropical Japonica	Sri Lanka	SRR1240078	Hap2
W284	Paikasa	Tropical Japonica	Malaysia	SRR1240087	Hap2
W285	Uwi	Tropical Japonica	Indonesia	SRR1240088	Hap2
W288	Dourado_Precoce	Tropical Japonica	Brazil	SRR1240091	Hap2
W300	NEW_BONNET	Tropical Japonica	United States	SRR1240103	Hap2
W303	British_Honduras_Creole	Tropical Japonica	Belize	SRR1240106	Hap2
W329	GPNO_5055	Tropical Japonica	United States	SRR1240132	Hap2
C013	N_22	Aus	Philippines	SRR1239613	Hap3
C015	Dular	Aus	Heilongjiang	SRR1239615	Hap3
C086	Fanhaopi	Aus	Yunnan	SRR1239686	Hap3
CX227	KASALATH	Aus	Japan	ERS470551	Hap3
CX368	N22	Aus	India	ERS470653	Hap3
IRIS_313-10543	DODGUI	Aus	India	ERS469403	Hap3
IRIS_313-10592	DJ69	Aus	Bangladesh	ERS469445	Hap3
IRIS_313-10593	DJ47	Aus	Bangladesh	ERS469446	Hap3
IRIS_313-10594	DJ29	Aus	Bangladesh	ERS469447	Hap3
IRIS_313-10598	DD126	Aus	Bangladesh	ERS469449	Hap3
IRIS_313-10734	DEVARASI	Aus	Nepal	ERS469541	Hap3
IRIS_313-10852	ARC_7336	Aus	India	ERS469655	Hap3
IRIS_313-10869	ARC_11751	Aus	India	ERS469672	Hap3
IRIS_313-10873	ARC_11822	Aus	India	ERS469677	Hap3
IRIS_313-10875	ARC_12021	Aus	India	ERS469679	Hap3
IRIS_313-10925	KAMULI	Aus	Nepal	ERS469724	Hap3
IRIS_313-11018	MADISA	Aus	Bangladesh	ERS469815	Hap3
IRIS_313-11020	BAMLA_SUFFAID_320	Aus	Pakistan	ERS469817	Hap3
IRIS_313-11036	34	Aus	Pakistan	ERS469835	Hap3
IRIS_313-11037	421	Aus	Pakistan	ERS469836	Hap3
IRIS_313-11047	AUS_84	Aus	Bangladesh	ERS469847	Hap3
IRIS_313-11154	DHARIAL	Aus	Bangladesh	ERS469955	Hap3
IRIS_313-11170	LAL_TAURA	Aus	India	ERS469973	Hap3
IRIS_313-11171	M_142	Aus	India	ERS469974	Hap3
IRIS_313-11210	ZARBASAIL	Aus	Bangladesh	ERS470001	Hap3
IRIS_313-11213	NARIKEL_BADI	Aus	Bangladesh	ERS470005	Hap3
IRIS_313-11291	ARC_7425	Aus	India	ERS470080	Hap3
IRIS_313-11322	JASURE_AUS	Aus	Bangladesh	ERS470114	Hap3
IRIS_313-11323	JHORA	Aus	Bangladesh	ERS470115	Hap3
IRIS_313-11452	LOCAL_BHAT	Aus	India	ERS468668	Hap3
IRIS_313-11483	BOTESHSHORE	Aus	Bangladesh	ERS468694	Hap3
IRIS_313-11557	GORIA	Aus	Bangladesh	ERS468754	Hap3
IRIS_313-11595	AMAKOYALI	Aus	India	ERS468782	Hap3
IRIS_313-11598	GODADANI	Aus	India	ERS468785	Hap3
IRIS_313-11603	PANDRI_PAREWA	Aus	India	ERS468790	Hap3
IRIS_313-11629	LATIJHABAR	Aus	Nepal	ERS468808	Hap3
IRIS_313-11636	NCS271_A	Aus	India	ERS468813	Hap3
IRIS_313-11712	GORA_DHAN_2	Aus	India	ERS468876	Hap3
IRIS_313-11982	PORASHI	Aus	Bangladesh	ERS469156	Hap3
IRIS_313-12002	LARA_BORO	Aus	Bangladesh	ERS469140	Hap3
IRIS_313-12055	LAL_MOTI	Aus	Bangladesh	ERS469188	Hap3
IRIS_313-12139	MANSARA_DHAN	Aus	Nepal	ERS469231	Hap3
IRIS_313-8073	DAWN_CI_9534	Aus	United States	ERS468541	Hap3
IRIS_313-8252	JAGLI_BORO	Aus	Bangladesh	ERS467774	Hap3
IRIS_313-8342	KURULU_WEE(WHITE)	Aus	Sri Lanka	ERS467819	Hap3
IRIS_313-8390	SUFAID_246	Aus	Pakistan	ERS467776	Hap3
IRIS_313-8554	ARC_11959	Aus	India	ERS467779	Hap3
IRIS_313-8641	AUS_439	Aus	Bangladesh	ERS467862	Hap3
IRIS_313-8721	HOLOI_BASH(SOLOI_BASH)	Aus	Bangladesh	ERS467780	Hap3
IRIS_313-8771	SIMUL_KHURI	Aus	India	ERS467821	Hap3
IRIS_313-8789	LALSAITA	Aus	Bangladesh	ERS467822	Hap3
IRIS_313-8864	NOROI	Aus	Bangladesh	ERS467823	Hap3
IRIS_313-9283	TAK_SUFAID	Aus	Pakistan	ERS467783	Hap3
IRIS_313-9368	CHANDARHAT	Aus	Bangladesh	ERS467784	Hap3
IRIS_313-9661	LENJA_MURALI	Aus	Bangladesh	ERS467789	Hap3
W015	Safut_Khosha	Aus	Afghanistan	SRR1239818	Hap3
W020	IARI_6626	Aus	India	SRR1239823	Hap3
W025	NC_1/536	Aus	Pakistan	SRR1239828	Hap3
W028	Doble_Carolina	Aus	Uruguay	SRR1239831	Hap3
W034	PATNAI_6	Aus	Myanmar	SRR1239837	Hap3
W049	PHUDUGEY	Aus	Bhutan	SRR1239852	Hap3
W069	99216	Aus	India	SRR1239872	Hap3
W072	SORNAVARI	Aus	Mali	SRR1239875	Hap3
W076	Tauli	Aus	Nepal	SRR1239879	Hap3
W090	C.B._II	Aus	Japan	SRR1239893	Hap3
W094	Nang_Bang_Bentre	Aus	Vietnam	SRR1239897	Hap3
W095	DJ_24	Aus	Bangladesh	SRR1239898	Hap3
W098	UZ_ROS_7-13	Aus	Uzbekistan	SRR1239901	Hap3
W100	Spin_Mere	Aus	Afghanistan	SRR1239903	Hap3
W103	P_35	Aus	India	SRR1239906	Hap3
W104	CAROLINO_164	Aus	Chad	SRR1239907	Hap3
W106	Daudzai_Field_Mix	Aus	Pakistan	SRR1239909	Hap3
W108	Hi_Muke	Aus	Kazakhstan	SRR1239911	Hap3
W115	THAVALU	Aus	Sri Lanka	SRR1239918	Hap3
W121	TCHAMPA	Aus	Iran	SRR1239924	Hap3
W131	IARI_6621	Aus	India	SRR1239934	Hap3
W134	Dara	Aus	Indonesia	SRR1239937	Hap3
W141	DNJ_179	Aus	Bangladesh	SRR1239944	Hap3
W142	DNJ_121	Aus	Bangladesh	SRR1239945	Hap3
W214	Jhona349	Aus	Pakistan	SRR1240017	Hap3
W215	Karnal_Local	Aus	India	SRR1240018	Hap3
W277	Lakkhi_kajal	Aus	Bangladesh	SRR1240080	Hap3
W278	Moisdol	Aus	Bangladesh	SRR1240081	Hap3
W279	Jabor_sail	Aus	Bangladesh	SRR1240082	Hap3
W280	Sada_solay	Aus	Pakistan	SRR1240083	Hap3
W286	Garia	Aus	Bangladesh	SRR1240089	Hap3
W287	AUS_449	Aus	Bangladesh	SRR1240090	Hap3
W292	Khoia_boro	Aus	Bangladesh	SRR1240095	Hap3
W296	AUS_371	Aus	Bangladesh	SRR1240099	Hap3
W297	AUS_373	Aus	Bangladesh	SRR1240100	Hap3
W330	ASWINA_330	Aus	Bangladesh	SRR1240133	Hap3
CX228	Bala	Indica Intermediate	India	ERS470552	Hap3
CX236	Vandana	Indica Intermediate	None	ERS470560	Hap3
IRIS_313-11260	ARC_13591	Indica Intermediate	India	ERS470055	Hap3
W107	JP_5	Indica Intermediate	Pakistan	SRR1239910	Hap3
CX112	Ginga	Intermediate	Japan	ERS470477	Hap3
IRIS_313-11066	GASMAL_339	Intermediate	Bangladesh	ERS469868	Hap3
CX149	Karnal_Local	VI/Aromatic	India	ERS470513	Hap3
IRIS_313-10449	NONE	Indica I	China	ERS469362	Hap4
C051	PeiC122	Intermediate	Unknown	SRR1239651	Hap4
C014	M202	Japonica Intermediate	India	SRR1239614	Hap4
C029	Huhui628	Japonica Intermediate	Unknown	SRR1239629	Hap4
IRIS_313-10083	BETIS	Japonica Intermediate	Spain	ERS468356	Hap4
IRIS_313-10295	PDR_34-2-1-2	Japonica Intermediate	Pakistan	ERS468191	Hap4
IRIS_313-7850	BODA_148-3	Japonica Intermediate	Madagascar	ERS468614	Hap4
IRIS_313-8444	M_203	Japonica Intermediate	United States	ERS468316	Hap4
IRIS_313-9980	FORTUNA_INIA	Japonica Intermediate	Argentina	ERS468411	Hap4
C012	Tainong67	Temperate Japonica	Philippines	SRR1239612	Hap4
C016	Laoguangtou83	Temperate Japonica	Heilongjiang	SRR1239616	Hap4
C018	AnnongwangengB-2	Temperate Japonica	Zhejiang	SRR1239618	Hap4
C023	Funingzipi	Temperate Japonica	Hebei	SRR1239623	Hap4
C026	Weiguo	Temperate Japonica	Liaoning	SRR1239626	Hap4
C028	Liaogeng287	Temperate Japonica	Liaoning	SRR1239628	Hap4
C035	Yelicanghua	Temperate Japonica	Hebei	SRR1239635	Hap4
C048	Zaoshunonghu6	Temperate Japonica	Hunan	SRR1239648	Hap4
C052	Guihuahuang	Temperate Japonica	Jiangsu	SRR1239652	Hap4
C054	Xiushui115	Temperate Japonica	Zhejiang	SRR1239654	Hap4
C063	Geng87-304	Temperate Japonica	Hunan	SRR1239663	Hap4
C064	Sugeng2hao	Temperate Japonica	Jiangsu	SRR1239664	Hap4
C067	Muxiqiu	Temperate Japonica	Jiangsu	SRR1239667	Hap4
C070	Youmangzaogeng	Temperate Japonica	Jiangsu	SRR1239670	Hap4
C071	Laohuzhong	Temperate Japonica	Shanghai	SRR1239671	Hap4
C075	Huangkezaonian	Temperate Japonica	Jiangsu	SRR1239675	Hap4
C079	Muguanuo-1	Temperate Japonica	Hunan	SRR1239679	Hap4
C087	Lixingeng	Temperate Japonica	Sichuan	SRR1239687	Hap4
C089	Tieganwu	Temperate Japonica	Zhejiang	SRR1239689	Hap4
C093	Xiangnuo-2	Temperate Japonica	Guizhou	SRR1239693	Hap4
C101	Babaili	Temperate Japonica	Yunnan	SRR1239701	Hap4
C106	Hongkezhenuo	Temperate Japonica	Guizhou	SRR1239706	Hap4
C111	Ximaxian	Temperate Japonica	Yunnan	SRR1239711	Hap4
C116	LimingB	Temperate Japonica	Liaoning	SRR1239716	Hap4
C119	Ninghui21	Temperate Japonica	Unknown	SRR1239719	Hap4
C120	Shuiyuan300li	Temperate Japonica	Tianjin	SRR1239720	Hap4
C126	Hongqi5hao	Temperate Japonica	Hunan	SRR1239726	Hap4
C130	Xiangnuo-1	Temperate Japonica	Guizhou	SRR1239730	Hap4
C133	Muguanuo-2	Temperate Japonica	Shanxi	SRR1239733	Hap4
C134	Wuzidui	Temperate Japonica	Yunnan	SRR1239734	Hap4
C144	Huangpinuo	Temperate Japonica	Yunnan	SRR1239744	Hap4
C146	Nipponbare	Temperate Japonica	Japan	SRR1239746	Hap4
C149	Zhonghua11	Temperate Japonica	Beijing	SRR1239749	Hap4
C150	Balilla	Temperate Japonica	Italy	SRR1239750	Hap4
C152	02428	Temperate Japonica	Jiangsu	SRR1239752	Hap4
C154	Heigeng2hao	Temperate Japonica	Heilongjiang	SRR1239754	Hap4
C172	Zhonghua8hao	Temperate Japonica	Beijing	SRR1239772	Hap4
C177	Maguzi	Temperate Japonica	Shanxi	SRR1239777	Hap4
C187	Niankenuo	Temperate Japonica	Guizhou	SRR1239787	Hap4
C188	Yangkenuo	Temperate Japonica	Guizhou	SRR1239788	Hap4
C189	Putaohuang	Temperate Japonica	Tianjin	SRR1239789	Hap4
C195	Hongmisandan	Temperate Japonica	Jiangxi	SRR1239795	Hap4
CX165	Wuyugeng_3_	Temperate Japonica	China	ERS470528	Hap4
CX251	Xudao_4_	Temperate Japonica	China	ERS470573	Hap4
CX287	C52	Temperate Japonica	China	ERS470597	Hap4
CX315	Zidao	Temperate Japonica	North Korea	ERS470613	Hap4
CX344	Hexi_41	Temperate Japonica	China	ERS470628	Hap4
CX345	Yungeng_23	Temperate Japonica	China	ERS470629	Hap4
CX356	Yandao_8__	Temperate Japonica	China	ERS470641	Hap4
CX380	Yandao_9	Temperate Japonica	China	ERS470666	Hap4
CX383	Hongza_	Temperate Japonica	China	ERS470669	Hap4
CX384	Fengza	Temperate Japonica	China	ERS470670	Hap4
CX391	YJ30	Temperate Japonica	China	ERS470677	Hap4
CX397	Nangeng_46_(Soft_Rice)	Temperate Japonica	China	ERS470683	Hap4
CX74	JP-5	Temperate Japonica	Pakistan	ERS470727	Hap4
IRIS_313-10059	DACHEONGBYEO	Temperate Japonica	South Korea	ERS468355	Hap4
IRIS_313-10084	SENIA	Temperate Japonica	Spain	ERS468357	Hap4
IRIS_313-10093	CHEONJUDO	Temperate Japonica	South Korea	ERS468360	Hap4
IRIS_313-10430	GINMASARI	Temperate Japonica	Japan	ERS469369	Hap4
IRIS_313-10437	NORIN_21	Temperate Japonica	Japan	ERS469356	Hap4
IRIS_313-10558	LITCHIKIANG	Temperate Japonica	China	ERS469415	Hap4
IRIS_313-10567	AIKAWA_44	Temperate Japonica	Japan	ERS469425	Hap4
IRIS_313-10568	OITA-MII_120	Temperate Japonica	Japan	ERS469426	Hap4
IRIS_313-10618	CHINES	Temperate Japonica	None	ERS469483	Hap4
IRIS_313-11202	4583	Temperate Japonica	China	ERS469993	Hap4
IRIS_313-11571	BAI_MANG_AI_ZHONG	Temperate Japonica	China	ERS468765	Hap4
IRIS_313-11803	MAO_ZHA_NUO	Temperate Japonica	China	ERS468952	Hap4
IRIS_313-11829	MUNJI	Temperate Japonica	Pakistan	ERS468980	Hap4
IRIS_313-11875	CHUBU_17	Temperate Japonica	Japan	ERS469027	Hap4
IRIS_313-11890	C_722323	Temperate Japonica	China	ERS469088	Hap4
IRIS_313-12054	HUA_24	Temperate Japonica	China	ERS469187	Hap4
IRIS_313-8087	FRANCES	Temperate Japonica	Spain	ERS468497	Hap4
IRIS_313-8105	THAIPERLA	Temperate Japonica	United States	ERS468496	Hap4
IRIS_313-8204	S_102	Temperate Japonica	United States	ERS468515	Hap4
IRIS_313-8856	S_201	Temperate Japonica	United States	ERS468321	Hap4
IRIS_313-9081	TAKAO_MOCHI	Temperate Japonica	Japan	ERS467898	Hap4
IRIS_313-9724	AI_DA_ZHONG	Temperate Japonica	China	ERS467846	Hap4
IRIS_313-9814	AMARELO	Temperate Japonica	Hungary	ERS467800	Hap4
W011	SHIMIZU_MOCHI	Temperate Japonica	Japan	SRR1239814	Hap4
W012	KRASNODARSKIJ_424	Temperate Japonica	Russian Federation	SRR1239815	Hap4
W013	Pergonil_15	Temperate Japonica	Portugal	SRR1239816	Hap4
W038	BLUE_STICK	Temperate Japonica	Fiji	SRR1239841	Hap4
W045	KUBANETS_508	Temperate Japonica	Russian Federation	SRR1239848	Hap4
W052	HB-6-2	Temperate Japonica	Hungary	SRR1239855	Hap4
W056	Tamanishiki	Temperate Japonica	Japan	SRR1239859	Hap4
W059	Niwahutaw_Mochi	Temperate Japonica	Japan	SRR1239862	Hap4
W060	Somewake	Temperate Japonica	Japan	SRR1239863	Hap4
W068	Gazan	Temperate Japonica	Afghanistan	SRR1239871	Hap4
W082	Celiaj	Temperate Japonica	Azerbaijan	SRR1239885	Hap4
W117	KRASNODARSKIJ_3352	Temperate Japonica	Russian Federation	SRR1239920	Hap4
W139	A_5	Temperate Japonica	Japan	SRR1239942	Hap4
W160	Shennong265	Temperate Japonica	Unknown	SRR1239963	Hap4
W162	Yuanjing7	Temperate Japonica	China	SRR1239965	Hap4
W193	Dianjing	Temperate Japonica	Unknown	SRR1239996	Hap4
W207	Yunguang8hao	Temperate Japonica	yunnan	SRR1240010	Hap4
W208	Zhongchao123	Temperate Japonica	Unknown	SRR1240011	Hap4
W209	Gizal159	Temperate Japonica	Unknown	SRR1240012	Hap4
W226	M401	Temperate Japonica	Philippines	SRR1240029	Hap4
W232	C71	Temperate Japonica	Viet Nam	SRR1240035	Hap4
W281	Sholay	Temperate Japonica	Pakistan	SRR1240084	Hap4
W290	Aichi_Asahi	Temperate Japonica	Japan	SRR1240093	Hap4
W305	AKITAKOMACHI	Temperate Japonica	Japan	SRR1240108	Hap4
W319	Guangkexiangnuo	Temperate Japonica	Guangxi	SRR1240122	Hap4
W325	Guantuibaihe	Temperate Japonica	Guizhou	SRR1240128	Hap4
W093	Srav_Prapay	Indica III	Cambodia	SRR1239896	Hap5
W195	452	Indica II	Unknown	SRR1239998	Hap6
W096	DJ_102	Aus	Bangladesh	SRR1239899	Hap7

## Sheet: Table S2
Supplementary Table S2. Survival rates of 170 accessions after alkali and heat stress treatment, respectively.
ID	Cultivar Name	Subpopulation	Subpopulation_ed	Location	Accession	Haptype	Survival rates after alkali treatment (%)
IRIS_313-11031	NAWAN_SATHRA_BAGAR_344	Aus	Aus	Pakistan	ERS469829	Hap1	31.25
CX227	KASALATH	Aus	Aus	Japan	ERS470551	Hap3	43.75
IRIS_313-10592	DJ69	Aus	Aus	Bangladesh	ERS469445	Hap3	68.75
IRIS_313-10593	DJ47	Aus	Aus	Bangladesh	ERS469446	Hap3	62.5
IRIS_313-10875	ARC_12021	Aus	Aus	India	ERS469679	Hap3	12.5
IRIS_313-10925	KAMULI	Aus	Aus	Nepal	ERS469724	Hap3	75
IRIS_313-11020	BAMLA_SUFFAID_320	Aus	Aus	Pakistan	ERS469817	Hap3	37.5
IRIS_313-11047	AUS_84	Aus	Aus	Bangladesh	ERS469847	Hap3	50
IRIS_313-11154	DHARIAL	Aus	Aus	Bangladesh	ERS469955	Hap3	31.25
IRIS_313-11170	LAL_TAURA	Aus	Aus	India	ERS469973	Hap3	43.75
IRIS_313-11171	M_142	Aus	Aus	India	ERS469974	Hap3	43.75
IRIS_313-11210	ZARBASAIL	Aus	Aus	Bangladesh	ERS470001	Hap3	50
IRIS_313-11213	NARIKEL_BADI	Aus	Aus	Bangladesh	ERS470005	Hap3	31.25
IRIS_313-11322	JASURE_AUS	Aus	Aus	Bangladesh	ERS470114	Hap3	62.5
IRIS_313-11557	GORIA	Aus	Aus	Bangladesh	ERS468754	Hap3	43.75
IRIS_313-11595	AMAKOYALI	Aus	Aus	India	ERS468782	Hap3	25
IRIS_313-11629	LATIJHABAR	Aus	Aus	Nepal	ERS468808	Hap3	31.25
IRIS_313-11712	GORA_DHAN_2	Aus	Aus	India	ERS468876	Hap3	31.25
IRIS_313-11982	PORASHI	Aus	Aus	Bangladesh	ERS469156	Hap3	75
IRIS_313-12002	LARA_BORO	Aus	Aus	Bangladesh	ERS469140	Hap3	25
IRIS_313-12055	LAL_MOTI	Aus	Aus	Bangladesh	ERS469188	Hap3	75
IRIS_313-12139	MANSARA_DHAN	Aus	Aus	Nepal	ERS469231	Hap3	68.75
IRIS_313-8073	DAWN_CI_9534	Aus	Aus	United States	ERS468541	Hap3	31.25
IRIS_313-8641	AUS_439	Aus	Aus	Bangladesh	ERS467862	Hap3	75
CX131	ZALE	Indica I	Indica	Myanmar	ERS470497	Hap1	37.5
CX390	Yuelianggu	Indica I	Indica	China	ERS470676	Hap1	37.5
IRIS_313-10129	SAN_SHIH_TSI	Indica I	Indica	China	ERS468157	Hap1	43.75
IRIS_313-11624	ANADI_WHITE	Indica I	Indica	Nepal	ERS468802	Hap1	31.25
IRIS_313-11667	LUO_AI_ZAO_3	Indica I	Indica	China	ERS468844	Hap1	37.5
IRIS_313-11862	HENG_YE_ZAO	Indica I	Indica	China	ERS469016	Hap1	37.5
IRIS_313-11876	AI_DA	Indica I	Indica	China	ERS469028	Hap1	12.5
IRIS_313-11968	ZHAO_DAN_AI	Indica I	Indica	China	ERS469114	Hap1	25
IRIS_313-8380	SAN_CHIAO_TSWEN	Indica I	Indica	China	ERS467935	Hap1	43.75
IRIS_313-9324	CHIH_SHEN_LI	Indica I	Indica	China	ERS468058	Hap1	18.75
CX121	Guang122	Indica II	Indica	China	ERS470487	Hap1	18.75
CX237	B6136-3-TB-0-1-5	Indica II	Indica	Philippines	ERS470561	Hap1	18.75
CX238	BW311-9	Indica II	Indica	Philippines	ERS470562	Hap1	31.25
CX26	Amol3(Sana)	Indica II	Indica	Iran	ERS470574	Hap1	25
CX281	IR68897B	Indica II	Indica	Philippines	ERS470592	Hap1	18.75
CX360	Y075	Indica II	Indica	None	ERS470645	Hap1	37.5
CX362	YZX1	Indica II	Indica	None	ERS470647	Hap1	31.25
CX370	Chenghui_727	Indica II	Indica	China	ERS470656	Hap1	50
CX381	Adny_11	Indica II	Indica	None	ERS470667	Hap1	25
CX399	Matatag2	Indica II	Indica	Philippines	ERS470684	Hap1	12.5
CX75	At354	Indica II	Indica	Sri Lanka	ERS470728	Hap1	25
CX82	X21	Indica II	Indica	Vietnam	ERS470735	Hap1	31.25
CX85	C71	Indica II	Indica	Vietnam	ERS470738	Hap1	18.75
IRIS_313-10167	IR_56	Indica II	Indica	Philippines	ERS468164	Hap1	18.75
IRIS_313-10287	UQUIHUA	Indica II	Indica	Peru	ERS468230	Hap1	25
IRIS_313-10397	IRGA_318-11-6-9-2B	Indica II	Indica	Colombia	ERS467924	Hap1	18.75
IRIS_313-11960	PORONG	Indica II	Indica	Indonesia	ERS469105	Hap1	18.75
IRIS_313-12234	ANLINGWUBAILI	Indica II	Indica	China	ERS469271	Hap1	25
IRIS_313-7826	WAS_33-B-B-15-1-4-5	Indica II	Indica	Senegal	ERS468566	Hap1	12.5
IRIS_313-10544	DONGREM	Indica III	Indica	India	ERS469404	Hap1	43.75
IRIS_313-11101	NONE	Indica III	Indica	Liberia	ERS469897	Hap1	31.25
IRIS_313-11288	ARC_18434	Indica III	Indica	India	ERS470077	Hap1	18.75
IRIS_313-8450	498-2A_BR_8	Indica III	Indica	India	ERS467942	Hap1	43.75
IRIS_313-9970	RACE_PERUMAL	Indica III	Indica	Sri Lanka	ERS468135	Hap1	12.5
CX119	P59279	Indica Intermediate	Indica	None	ERS470484	Hap1	31.25
CX182	SLG1	Indica Intermediate	Indica	Japan	ERS470531	Hap1	18.75
CX221	Zhongyouzao_81	Indica Intermediate	Indica	China	ERS470548	Hap1	25
CX265	MONOLAYA	Indica Intermediate	Indica	United States	ERS470577	Hap1	18.75
CX319	Mengguandamagu	Indica Intermediate	Indica	China	ERS470617	Hap1	18.75
CX64	IRAT_352	Indica Intermediate	Indica	Philippines	ERS470717	Hap1	18.75
IRIS_313-10234	PSBRC50	Indica Intermediate	Indica	Philippines	ERS468178	Hap1	37.5
IRIS_313-10404	K_479-2-3	Indica Intermediate	Indica	India	ERS467927	Hap1	37.5
IRIS_313-10835	PERUNEL_0-69-18	Indica Intermediate	Indica	India	ERS469638	Hap1	18.75
IRIS_313-11041	POONGAR	Indica Intermediate	Indica	India	ERS469840	Hap1	18.75
IRIS_313-11255	ARC_7056	Indica Intermediate	Indica	India	ERS470050	Hap1	43.75
IRIS_313-11731	QING_TAI_AI	Indica Intermediate	Indica	China	ERS468894	Hap1	12.5
IRIS_313-12329	CHAO_DO	Indica Intermediate	Indica	Laos	ERS469333	Hap1	37.5
IRIS_313-9023	CR60-10	Indica Intermediate	Indica	India	ERS468014	Hap1	25
IRIS_313-9503	BINUHANGIN	Indica Intermediate	Indica	Philippines	ERS468076	Hap1	12.5
CX230	IR64-IL	Indica II	Indica	China	ERS470554	Hap2	25
CX377	NERICA-L-27	Indica II	Indica	Africa	ERS470663	Hap2	18.75
CX382	Kogomg_1-1	Indica II	Indica	None	ERS470668	Hap2	12.5
CX403	IR64a	Indica II	Indica	Philippines	ERS470689	Hap2	50
CX76	BG304	Indica II	Indica	Sri Lanka	ERS470729	Hap2	6.25
IRIS_313-10289	ARAURE_1	Indica II	Indica	Venezuela	ERS467914	Hap2	25
IRIS_313-7832	WAS_63-22-5-9-10-1	Indica II	Indica	Senegal	ERS468550	Hap2	37.5
IRIS_313-11129	HAORU	Indica III	Indica	Myanmar	ERS469928	Hap2	25
CX219	FL478	Indica Intermediate	Indica	Philippines	ERS470545	Hap2	31.25
CX240	Carijo	Indica Intermediate	Indica	Brazil	ERS470564	Hap2	12.5
IRIS_313-10026	KITRANA_1007	Indica Intermediate	Indica	Madagascar	ERS468144	Hap2	6.25
IRIS_313-10113	EX_FOILAEIN(NAPUTO)	Indica Intermediate	Indica	Mozambique	ERS468155	Hap2	6.25
IRIS_313-7650	BOTOHAVANA_139	Indica Intermediate	Indica	Madagascar	ERS468584	Hap2	56.25
IRIS_313-7654	BOUAKE_189	Indica Intermediate	Indica	Ivory Coast	ERS468579	Hap2	25
IRIS_313-9388	VARY_MALADY_MENA	Indica Intermediate	Indica	Madagascar	ERS467841	Hap2	37.5
CX353	CAU1	Japonica Intermediate	Japonica	China	ERS470638	Hap2	56.25
IRIS_313-10119	GITANO	Japonica Intermediate	Japonica	Italy	ERS468363	Hap2	81.25
IRIS_313-10258	BULI_INIA	Japonica Intermediate	Japonica	Chile	ERS467900	Hap2	93.75
IRIS_313-10834	IARI_11387	Japonica Intermediate	Japonica	India	ERS469637	Hap2	50
IRIS_313-12340	Nyao	Japonica Intermediate	Japonica	Laos	ERS469340	Hap2	75
IRIS_313-12342	Hai_na	Japonica Intermediate	Japonica	Laos	ERS469343	Hap2	81.25
IRIS_313-12352	MEE	Japonica Intermediate	Japonica	Laos	ERS469352	Hap2	56.25
IRIS_313-8027	ANSEATICO	Japonica Intermediate	Japonica	Italy	ERS468533	Hap2	62.5
IRIS_313-8139	SANDOCA	Japonica Intermediate	Japonica	Portugal	ERS468536	Hap2	87.5
IRIS_313-8145	SUPER	Japonica Intermediate	Japonica	Portugal	ERS468476	Hap2	93.75
IRIS_313-8158	CT_23	Japonica Intermediate	Japonica	Colombia	ERS468637	Hap2	56.25
IRIS_313-8159	CT_36	Japonica Intermediate	Japonica	Colombia	ERS468638	Hap2	50
IRIS_313-8177	AUGUSTO	Japonica Intermediate	Japonica	Italy	ERS468529	Hap2	68.75
IRIS_313-9193	EAN_4_C_1	Japonica Intermediate	Japonica	Brazil	ERS468323	Hap2	62.5
CX49	NAN-29-2	Temperate Japonica	Japonica	China	ERS470698	Hap2	93.75
IRIS_313-8109	CAMPINO	Temperate Japonica	Japonica	Portugal	ERS468471	Hap2	87.5
IRIS_313-8136	SAFARI	Temperate Japonica	Japonica	Portugal	ERS468492	Hap2	68.75
IRIS_313-8137	SAGRES	Temperate Japonica	Japonica	Portugal	ERS468557	Hap2	81.25
IRIS_313-8149	TOPAZIO	Temperate Japonica	Japonica	Portugal	ERS468499	Hap2	100
IRIS_313-8218	SAKHA_103	Temperate Japonica	Japonica	Egypt	ERS468689	Hap2	81.25
CX129	MOLOK	Tropical Japonica	Japonica	Indonesia	ERS470494	Hap2	50
CX355	Yunlu_102	Tropical Japonica	Japonica	China	ERS470640	Hap2	56.25
CX371	NERICA_1	Tropical Japonica	Japonica	Africa	ERS470657	Hap2	43.75
CX374	NERICA_9	Tropical Japonica	Japonica	Africa	ERS470660	Hap2	87.5
IRIS_313-10051	TSIVIMBININA	Tropical Japonica	Japonica	Madagascar	ERS467905	Hap2	87.5
IRIS_313-10075	SANGOKU	Tropical Japonica	Japonica	Japan	ERS468420	Hap2	56.25
IRIS_313-10272	COLOMBIA_1	Tropical Japonica	Japonica	Colombia	ERS467805	Hap2	50
IRIS_313-10644	BUSIYETAN	Tropical Japonica	Japonica	Philippines	ERS469466	Hap2	81.25
IRIS_313-10708	B_6311_A_5553-16-2	Tropical Japonica	Japonica	United States	ERS469533	Hap2	56.25
IRIS_313-10743	SERAJU	Tropical Japonica	Japonica	Indonesia	ERS469551	Hap2	37.5
IRIS_313-10794	MENDUNGAN	Tropical Japonica	Japonica	Indonesia	ERS469603	Hap2	68.75
IRIS_313-10796	MOLOG	Tropical Japonica	Japonica	Indonesia	ERS469605	Hap2	56.25
IRIS_313-10827	BINARITOS	Tropical Japonica	Japonica	Philippines	ERS469629	Hap2	81.25
IRIS_313-10888	ARC_12726	Tropical Japonica	Japonica	India	ERS469693	Hap2	81.25
IRIS_313-10893	ARC_13156	Tropical Japonica	Japonica	India	ERS469699	Hap2	56.25
IRIS_313-10920	PINIDWA_QAN_QIPUGO_QELEK	Tropical Japonica	Japonica	Philippines	ERS469718	Hap2	75
IRIS_313-10953	PADI_ABUNG_KUNING	Tropical Japonica	Japonica	Indonesia	ERS469754	Hap2	75
IRIS_313-11428	MARANHAO_BRANCO	Tropical Japonica	Japonica	Brazil	ERS468717	Hap2	87.5
IRIS_313-11435	MONMINEUPLEU	Tropical Japonica	Japonica	Ivory Coast	ERS468652	Hap2	93.75
IRIS_313-11465	DINORADO	Tropical Japonica	Japonica	Philippines	ERS468680	Hap2	68.75
IRIS_313-11673	BURI-BURING	Tropical Japonica	Japonica	Philippines	ERS468849	Hap2	81.25
IRIS_313-11929	GILINGAN_MARANGRAS	Tropical Japonica	Japonica	Philippines	ERS469074	Hap2	62.5
IRIS_313-7838	62667	Tropical Japonica	Japonica	Senegal	ERS468599	Hap2	75
IRIS_313-8061	75_UPLA	Tropical Japonica	Japonica	Argentina	ERS468627	Hap2	93.75
IRIS_313-8102	BLUE_BONNET	Tropical Japonica	Japonica	United States	ERS468537	Hap2	43.75
IRIS_313-8180	DELLMONT	Tropical Japonica	Japonica	United States	ERS468521	Hap2	68.75
IRIS_313-8209	ALEXANDROS	Tropical Japonica	Japonica	Greece	ERS468463	Hap2	75
IRIS_313-8431	BOCAO	Tropical Japonica	Japonica	Philippines	ERS468454	Hap2	50
IRIS_313-8523	OS4	Tropical Japonica	Japonica	Nigeria	ERS467890	Hap2	93.75
IRIS_313-8572	ONOY	Tropical Japonica	Japonica	Philippines	ERS468438	Hap2	43.75
IRIS_313-8768	MOROFIN	Tropical Japonica	Japonica	Ivory Coast	ERS468381	Hap2	75
IRIS_313-9050	ANGKARONG	Tropical Japonica	Japonica	Malaysia	ERS468448	Hap2	93.75
IRIS_313-9389	KINANDANG_BUSIKSIK	Tropical Japonica	Japonica	Philippines	ERS468397	Hap2	87.5
IRIS_313-9550	VEGOLD	Tropical Japonica	Japonica	United States	ERS468404	Hap2	56.25
IRIS_313-9745	VARY_MALADY	Tropical Japonica	Japonica	Madagascar	ERS468406	Hap2	87.5
IRIS_313-10295	PDR_34-2-1-2	Japonica Intermediate	Japonica	Pakistan	ERS468191	Hap4	37.5
IRIS_313-7850	BODA_148-3	Japonica Intermediate	Japonica	Madagascar	ERS468614	Hap4	93.75
IRIS_313-8444	M_203	Japonica Intermediate	Japonica	United States	ERS468316	Hap4	87.5
IRIS_313-9980	FORTUNA_INIA	Japonica Intermediate	Japonica	Argentina	ERS468411	Hap4	87.5
CX251	Xudao_4_	Temperate Japonica	Japonica	China	ERS470573	Hap4	87.5
CX356	Yandao_8__	Temperate Japonica	Japonica	China	ERS470641	Hap4	93.75
CX380	Yandao_9	Temperate Japonica	Japonica	China	ERS470666	Hap4	81.25
CX384	Fengza	Temperate Japonica	Japonica	China	ERS470670	Hap4	81.25
CX391	YJ30	Temperate Japonica	Japonica	China	ERS470677	Hap4	81.25
CX397	Nangeng_46_(Soft_Rice)	Temperate Japonica	Japonica	China	ERS470683	Hap4	75
CX74	JP-5	Temperate Japonica	Japonica	Pakistan	ERS470727	Hap4	87.5
IRIS_313-10059	DACHEONGBYEO	Temperate Japonica	Japonica	South Korea	ERS468355	Hap4	93.75
IRIS_313-10084	SENIA	Temperate Japonica	Japonica	Spain	ERS468357	Hap4	81.25
IRIS_313-10430	GINMASARI	Temperate Japonica	Japonica	Japan	ERS469369	Hap4	100
IRIS_313-10567	AIKAWA_44	Temperate Japonica	Japonica	Japan	ERS469425	Hap4	100
IRIS_313-10568	OITA-MII_120	Temperate Japonica	Japonica	Japan	ERS469426	Hap4	93.75
IRIS_313-10618	CHINES	Temperate Japonica	Japonica	None	ERS469483	Hap4	93.75
IRIS_313-11202	4583	Temperate Japonica	Japonica	China	ERS469993	Hap4	100
IRIS_313-11571	BAI_MANG_AI_ZHONG	Temperate Japonica	Japonica	China	ERS468765	Hap4	68.75
IRIS_313-11829	MUNJI	Temperate Japonica	Japonica	Pakistan	ERS468980	Hap4	100
IRIS_313-11890	C_722323	Temperate Japonica	Japonica	China	ERS469088	Hap4	100
IRIS_313-8087	FRANCES	Temperate Japonica	Japonica	Spain	ERS468497	Hap4	68.75
IRIS_313-8105	THAIPERLA	Temperate Japonica	Japonica	United States	ERS468496	Hap4	93.75
IRIS_313-8204	S_102	Temperate Japonica	Japonica	United States	ERS468515	Hap4	100
IRIS_313-9081	TAKAO_MOCHI	Temperate Japonica	Japonica	Japan	ERS467898	Hap4	93.75
IRIS_313-9724	AI_DA_ZHONG	Temperate Japonica	Japonica	China	ERS467846	Hap4	100
IRIS_313-9814	AMARELO	Temperate Japonica	Japonica	Hungary	ERS467800	Hap4	100

## Sheet: Table S3
Supplementary Table S3. Primers used for quantitative PCR in gene expression analysis.
Gene (accession number)	Primer name	Forward primer (5’-3’)	Reverse primer (5’-3’)
Actin (X15865)	Actin-F/R	TGTATGCCAGTGGTCGTACCA	CCAGCAAGGTCGAGACGAA
OsALDH2B1 (LOC_Os06g15990)	OsALDH2B1-qF1/qR1	TGTGCTGGGTCTCGTACATTTG	TCTTGTTGAATTGCTCGTCATCA
GS3 (LOC_Os03g29380)	GS3-qF1/qR1	GAACTCCTGATCCATTCATAACGATT	CAAACAGCGAAACTTCTTCAAGAA
CatA (LOC_Os02g02400)	CatA-qF/qR	TCTACTACTCCGACGACAAGAT	TCGTAGTGGTTGTTGTGGTG
CatB (LOC_Os06g51150)	CatB-qF/qR	TCATGCACAGGGATGAAGAG	GTTAGAACACGAGGAGGAATAGG
CatC (LOC_Os03g03910)	CatC-qF/qR	CGCGAGAAGGTGGTGATT	TCTCTTGATGAACCGGTCTTG

## Sheet: Table S4
Supplementary Table S4. Primers used for vector construction.
Gene (accession number)	Primer name	Forward primer (5’-3’)	Reverse primer (5’-3’)
OsALDH2B1 (LOC_Os06g15990)	OsALDH2B1_oeF1/oeR1	TGGCGCGCCACTAGTGGATCCATGGCTGCCGCTGCTGCAA	CATCCCGGGAGCGGTACCCAACCACGCGGCGTTCT
	OsALDH2B1_GFPF1/GFPR1	TTACGAACGATAGCCGGTACC ATGGCTGCCGCTGCTGCAA	GCGCTGAATTCCCGGGGATCC CAACCACGCGGCGTTCTTGA
	OsALDH2B1_MBPF1/MBPR1	GGAAGGATTTCAGAATTCATGGATAAAGCGGAATTAATT	GTCGACTCTAGAGGATCCTTACAACCACGCGGCGTTCT
	OsALDH2B1-BDF1/BDR1	TGGCCATGGAGGCCGAATTCATGGCTGCCGCTGCTGCAA	CGCTGCAGGTCGACGGATCCTTACAACCACGCGGCGTTCT
	Os ALDH2B1-cYFPF1/cYFPR1	CGGGATCCATGGCTGCCGCTGCTGCAA	GCGTCGACCAACCACGCGGCGTTCTTGA
CatA (LOC_Os02g02400)	CatA_ProF1/ProR1	CTATAGGGCGAATTGGGTACCTGTGCCCACCACAGCACACCTA	CGCTCTAGAACTAGTGGATCCGGTAGTGGGCTAGTGGCAGCA
	CatA_U3F1/U3R1	GGC A AGACGACGACGACGAACGC GTTTTAGAGCTAG	GCGTTCGTCGTCGTCGTCT T GCCACGGATCATCTGC
	CatA_U6aF1/U6aR1	GCC G GCTGTCTCACCGAGCAAGC GTTTTAGAGCTAG	GCTTGCTCGGTGAGACAGC C GGCAGCCAAGCCAGCAC
SERL1 (LOC_Os11g39370)	SERL1_U3F1/U3R1	GGC A AGGAGATTCTTGCCTTGTT GTTTTAGAGCTAG	AACAAGGCAAGAATCTCCT T GCCACGGATCATCTGC
	SERL1_U6aF1/U6aR1	GCC G CTGGCATTAGAAGAGGCAA GTTTTAGAGCTAG	TTGCCTCTTCTAATGCCAG C GGCAGCCAAGCCAGCAC
	SERL1_U3F2/U3R2	GGC a AGGCCTTACCTTCGGAATC GTTTTAGAGCTAG	GATTCCGAAGGTAAGGCCT T GCCACGGATCATCTGC
	SERL1_U6aF2/U6aR2	GCC g ACAGTCGCGGCGTACTGAA GTTTTAGAGCTAG	TTCAGTACGCCGCGACTGT C GGCAGCCAAGCCAGCAC
	SERL1-nYFPF1/nYFPR1	TGG CGC GCC ACT AGT GGA TCC ATGAAACTAATAGCTTTTGG	CATC CC GGG AGC GGT ACC TCTGCCACTGGATAGCTG
	SERL1_ADF1/ADR1	CCATGGAGGCCAGTGAATTGATGTTCCAGGTCAACATGAT	TGCAGCTCGAGCTCGGATCC TTATCTGCCACTGGATAGCTG
	SERL1_GSTF1/GSTR1	CAGGGGCCCCTGGGATCC GATGTTCCAGGTCAACATGAT	GCGTACGAGATCTG GAATTC TTATCTGCCACTGGATAGCTG
	SERL1_MBPF1/MBPR1	GGAAGGATTTCAGAATTC GATGTTCCAGGTCAACATGAT	GTCGACTCTAGAGGATCC TTATCTGCCACTGGATAGCTG
	SERL1S310R_F1/R1	ACATGGCAGAAAGGTTGCAGTTAGAAGACT	TTTCCACTTCAAACAGTCTTCTAACTGCAA
	SERL1S310D_F1/R1	ACATGGCAGAAAGGTTGCAGTTGATAGACT	TTTCCACTTCAAACAGTCTATCAACTGCAA
	SERL1_ProF1/R1	TGACCATGATTACGAATTCGTTTAGCTATAAGTGCTACAGTAA	TCTAGAGGATCCCCGGGTACCACTTCCTTGAAAATTATTATCA
	SERL1_GFPF1/GFPR1	TTTTCAAGGAAGTGGTACC ATGAAACTAATAGCTTTTGG	ACCCTCAGATCTACCATGGTGGCGACCGGGGATCT

## Sheet: Table S5
Supplementary Table S5. Primers used for ChIP-qPCR.
Gene (accession number)	Primer name	Forward primer (5’-3’)	Reverse primer (5’-3’)
CatA (LOC_Os02g02400)	CatA-ChIPqF1/ChIPqR1	TATGTCACTTCATCTTAAGCAAC	TTCTTAGTCCACGCTGATGA
	CatA-ChIPqF2/ChIPqR2	TCACGCTGTTACATAGGATGT	ATCATGGCGCAATTAGGCT
CatB (LOC_Os06g51150)	CatB-ChIPqF1/ChIPqR1	GGGTTTCCATGTCTAACTTTGA	TAACGTTTGACCGACCATCT
	CatB-ChIPqF2/ChIPqR2	CGTATGAACACACCGTGATTCT	GATGGATGCGGCAAACTAAAC
	CatB-ChIPqF3/ChIPqR3	ATACTAGCACGCTACGAAACC	GGGAAGAAGAGAAGAGAAGAGAAG
CatC (LOC_Os03g03910)	CatC-ChIPqF1/ChIPqR1	GAGTTGGAGTCGGTTGGTTT	CATTTCTTGGAGCTGAGCTAGT
	CatC-ChIPqF2/ChIPqR2	GGAATAGTCACACACACATGGA	CTGCACTAGCCTCTGGAATG
	CatC-ChIPqF3/ChIPqR3	GTTATTTTTCTGGACGGCGA	TGATGTGGAGTACGTGGGG
	CatC-ChIPqF4/ChIPqR4	CCCACGTACTCCACATCATT	CACACACCGCCCTACTTATAG
Ubiquitin (Os09g39500)	ubiquitinF/R	AACCAGCTGAGGCCCAAGA	ACGATTGATTTAACCAGTCCATGA

## Sheet: Table S6
Supplementary Table S6. Probe used for EMSA.
CatA-PA	TTTCCCCTCAAAAAAAAAAAGAAAGAAAAAAGCTTGTGCCCACCACAGCACA
